1 Major Subject Area(s): Computational & Systems Biology, Neuroscience

2

3 Automated analysis of internally programmed  
4 grooming behavior in *Drosophila* using a *k*-nearest  
5 neighbors classifier

6

7 Bing Qiao<sup>1, ☯</sup>, Chiyuan Li<sup>1, ☯</sup>, Victoria W. Allen<sup>2</sup>, Mimi M. Shirasu-Hiza<sup>2</sup>,

8 Sheyum Syed<sup>1, \*</sup>

9

10 1 Department of Physics, The University of Miami, 1320 Campo Sano Avenue, Coral  
11 Gables, FL 33146, USA

12 2 Department of Genetics and Development, Columbia University Medical Center, New  
13 York, NY 10032, USA

14 ☯ These authors contributed equally to this work.

15

16 \*Corresponding author: Sheyum Syed, 1320 Campo Sano Ave., Coral Gables, Florida,  
17 33146; phone (305) 284 7122; email [s.syed@miami.edu](mailto:s.syed@miami.edu)

## 18 **Abstract**

19 Despite being pervasive, the control of programmed grooming is poorly understood. We have  
20 addressed this gap in knowledge by developing a high-throughput platform that allows long-term  
21 detection of grooming in the fruit fly *Drosophila melanogaster*. Automatic classification of daily  
22 behavior shows flies spend 30% of their active time grooming. We show that a large proportion  
23 of this behavior is driven by two major internal programs. One of these programs is the circadian  
24 clock that modulates rhythms in daily grooming. The second program depends on *cycle* and *clock*  
25 and regulates the amount of time flies spend grooming. This emerging dual control model of  
26 programmed grooming in which one regulator controls the timing and another controls the  
27 duration, resembles the well-established two-process regulatory model of fly sleep. Together, our  
28 quantitative approach in *Drosophila* has revealed that grooming is an important internally driven  
29 behavior under the control of two regulatory programs.

## 30 **Introduction**

31 Grooming is broadly defined as a class of behaviors directed at the external surface of the body.  
32 Most animals spend considerable time grooming (Mooring, Blumstein, & Stoner, 2004; Sachs,  
33 1988) and this near universality suggests that grooming likely fulfills an essential role for animals  
34 (Spruijt, van Hooff, & Gispen, 1992). Grooming assumes a variety of forms in different species—  
35 for instance, birds preen the oily substance produced by the preening gland from their feathers  
36 and skin, cats and dogs lick their fur, and flies sweep their body parts with their legs. Though in  
37 most cases the primary function of grooming is to maintain a clean body surface, different species-  
38 specific forms of grooming have roles in diverse functions such as thermoregulation,  
39 communication and social relationships (Ferkin, Leonard, Heath, & Paz-y-Miño, 2001; Geist,  
40 Valerius. Walther, 1974; McKenna, 1978; Patenaude & Bovet, 1984; Richard & Dawkins, 1976;  
41 G. Schino, 2001; Gabriele Schino, Scucchi, Maestriperi, & Turillazzi, 1988; Seyfarth, 1977; Spruijt  
42 et al., 1992; Thiessen, Graham, Perkins, & Marcks, 1977; Walther, 1984).

43 Though grooming is widely observed and involved in many functions, the basic mechanisms  
44 regulating this behavior are still not well understood. Other major behaviors, such as locomotion,  
45 are controlled both by external stimuli (stimulated behavior) and by internal programs  
46 (programmed behavior). An example of stimulated locomotor activity might be an abrupt evasive  
47 response triggered by the sudden appearance of a predator, while programmed locomotor  
48 activities, such as daily foraging for food, are essential to maintain vital functions of the organism  
49 (Bergman, Schaefer, & Luttich, 2000). Limited data from mammals reveal that grooming, like  
50 locomotion, is likely controlled by both external stimuli and internal programs (Hart, Hart, Mooring,  
51 & Olubayo, 1992; Hawlena, Bashary, Abramsky, Khokhlova, & Krasnov, 2008; Mooring & Samuel,  
52 1998). However, a detailed understanding of these control mechanisms will require studies in an  
53 organism that permits genetic and neural access.

54 The fruit fly *Drosophila melanogaster* is an ideal model organism with which to dissect the  
55 fundamental mechanisms of grooming and its relationship to other behaviors. The fly is known to  
56 be a frequent groomer with a rich repertoire of behaviors and a sophisticated genetic toolkit  
57 developed to study them (Connolly, 1968; Oswald, Lin, & Waddell, 2015). The study of *Drosophila*  
58 grooming can be traced back to the 1960's (Connolly, 1968; Szebenyi, 1969) and notable  
59 progress has since been made on the regulation of grooming that ensues immediately after parts  
60 of the insect exterior are stimulated with dust particles (Hampel, Franconville, Simpson, & Seeds,  
61 2015; Seeds et al., 2014). While these and most grooming studies thus far have focused on  
62 stimulated grooming, understanding mechanisms responsible for programmed grooming will not  
63 only identify components distinct to each but also inform us about how programmed grooming is  
64 prioritized with regards to other programmed behaviors like locomotion, feeding and sleep.

65 A major hurdle in detecting programmed grooming in *Drosophila* is the lack of practical  
66 methodology. In many cases, fly grooming events are extracted by eye (King et al., 2016; Phillis  
67 et al., 1993; Yanagawa, Guigue, & Marion-Poll, 2014). Consequently, these data report only  
68 conspicuous behaviors and last for short durations. To improve resolution and accuracy, a  
69 number of sophisticated video-tracking methods have been recently developed for fly behavior  
70 (Kain et al., 2013; Mendes, Bartos, Akay, Márka, & Mann, 2013). However, these approaches are  
71 not ideal for detecting grooming since they focus on leg movements while grooming in flies also  
72 entails frequent movements of the antennae, wings and thorax (Seeds et al., 2014). Additionally,  
73 the methods are optimized for short-term monitoring (Branson, Robie, Bender, Perona, &  
74 Dickinson, 2009; Kabra, Robie, Rivera-Alba, Branson, & Branson, 2013) whereas continuous  
75 multi-hour measurements are necessary to dissect fly grooming in relation to other time-  
76 dependent behaviors like locomotion and sleep.

77 To overcome limitations in current methods, we developed a new platform for long-term video-  
78 tracking and automated analysis of fly grooming. The layout of our hardware takes advantage of

79 a design widely used in fly locomotion and sleep studies (Gilestro, 2012; Pfeiffenberger, Lear,  
80 Keegan, & Allada, 2010) and extends it to studies of grooming in this insect. Our algorithm maps  
81 fly activity onto a three-dimensional behavioral space and utilizes *k*-nearest neighbors (*k*NN)  
82 method, a machine learning technique, to classify each video frame as grooming, locomotion or  
83 rest. Results from multi-day recordings reveal that *Drosophila* spend approximately 30% of awake  
84 time grooming and that the temporal pattern of the behavior is tightly regulated by the fly's internal  
85 circadian pacemaker. These findings suggest grooming, similar to feeding and rest, likely serves  
86 one or more critical functions in *Drosophila*. Additionally, genetic perturbations and caloric  
87 restriction experiments reveal the transcription factors CYCLE and CLOCK as critical parts of an  
88 internal program that controls the amount of *Drosophila* grooming. Interestingly, although both  
89 *cyc*<sup>01</sup> and *clk*<sup>Jrk</sup> mutations increase the total amount of basal (internally programmed) grooming,  
90 they produce opposite effects when flies are starved (under external stimuli). These grooming  
91 data, the easily implementable hardware, and the automated analysis package together permit  
92 the construction of high-resolution ethograms of stereotypical fly behavior over the circadian time-  
93 scale.

94

## 95 **Results**

### 96 **Automatic grooming detecting system**

97 To monitor fly behavior, we used a custom-designed system with insects placed individually in  
98 tubes with food and cotton at opposite ends (Figure 1A). Tubes were placed in a chamber where  
99 temperature and humidity are monitored and controlled. Flies were illuminated from the sides by  
100 white light-emitting diodes (LED) to simulate day-night conditions and by infra-red LED from below  
101 for video imaging. Videos were captured by a digital camera above the chambers. A sample raw  
102 video clip is shown in Video 1.

103 We developed an automated video image analysis package that classifies fly behavior into  
104 grooming, locomotion, or rest. Grooming in our algorithm is defined as fly legs rubbing against  
105 each other or sweeping over the surface of the body and wings (Szebenyi, 1969) (Video 2, 3),  
106 locomotion as translation of the whole body and rest as the lack of either activity. Figure 1B shows  
107 images of grooming behaviors frequently observed in our videos involving the head, legs and  
108 wings. Since we are primarily interested in detecting grooming events rather than a detailed  
109 classification of behavior (Branson et al., 2009), all other behaviors involving body centroid  
110 movements are classified as locomotion. This three-tier classification allows our algorithm to  
111 efficiently and rapidly interpret grooming events in the recordings without incurring any significant  
112 errors in reporting locomotion and rest (see Methods).

113 To classify behavior, raw videos were processed through four major steps: fly identification,  
114 feature extraction, classifier training (optional), and behavior classification (Figure 1C).

### 115 **Behavior classification algorithm**

116 Fly identification was accomplished with the following analysis. Flies were first detected in a video  
117 frame by computing the difference between the current frame and a reference frame. The

118 reference or background frame was created by comparing two randomly selected frames and  
119 erasing all moving objects from one of them (see Methods). We updated the background frame  
120 every 1000 seconds to account for changes in the fly's surroundings (i.e., decrease in the level of  
121 food and accumulation of debris within the tube) over the course of multiple hours.

122 Our algorithm next extracted specific features to classify fly behavior. The features we used are:  
123 (1) periphery movement (PM), which characterizes movements of the legs, head and wings; (2)  
124 core movement (CM), which quantifies movements of the thorax and abdomen; and (3) centroid  
125 displacement (CD), which quantifies whole body displacement. While these intuitive features (PM,  
126 CM and CD) are not strictly orthogonal, comparison with orthogonal vectors demonstrated that  
127 use of PM, CM, and CD does not compromise accuracy of our algorithm (see Methods and  
128 Supplementary Figure S1H). We therefore used PM, CM and CD as our key features throughout  
129 the rest of this work. As shown in Figure 2A, relative metrics of PM and CM were different  
130 depending on the type of behavior. Specifically, during grooming, the periphery moved more than  
131 the core (Figure 2A, top-left, top-right); during locomotion, both parts moved significantly (Figure  
132 2A, bottom-right); while during rest, no significant movement was seen either in the periphery or  
133 the core (Figure 2A, bottom-left). The behavior-dependent changes of these features suggest that  
134 PM, CM and CD are appropriate metrics for behavior classification. Since differences in fly size  
135 can affect values of PM, CM and CD, we also normalized these features to individual fly size  
136 before proceeding with further analysis (see Methods).

137 We then classified fly behavior by applying the *k*-nearest neighbors (*k*NN) technique to the  
138 normalized features (Bishop, 2007). Briefly, *k*NN works by placing an unlabeled sample into a  
139 feature space with pre-labeled samples serving as a training set for the algorithm. The label or  
140 class of the unlabeled sample is then decided by the label that is most common among its *k*-  
141 nearest training samples. In our case, the nearest neighbors were searched through a *k*-d tree  
142 algorithm (Sproull, 1991). To construct the *k*NN classifier, we prepared a training set by visually

143 labeling fly behavior from 25000 frames and mapping them onto a three-dimensional feature  
144 space where the axes correspond to PM, CM and CD (Figure 2B, color symbols). We tested  
145 values of the parameter  $k$  between 1 and 50 and settled on  $k=10$  to achieve balance between  
146 computing time and accuracy (see Methods).

147 Finally, we pruned output labels from the  $k$ NN classifier (Figure 2C). The algorithm calculates  
148 features from every two consecutive frames, resulting in some classifications being confounded  
149 by short-term fly activity. For example, features extracted from only two frames often cannot  
150 distinguish a fly stretching its body parts from one that is grooming. Based on our observations  
151 during creation of the training set, a typical grooming bout lasts >3 seconds or for 15 frames at  
152 our normal frame rate, longer than an average stretching event, which lasts for ~1 second.  
153 Accordingly, we applied a 15-frame-long temporal filter that slides one frame at a time to eliminate  
154 false grooming labels caused by short, grooming-like behavior. Grooming designations were  
155 retained only if at least 12 grooming frames are found within the window. Otherwise, all grooming  
156 frames were relabeled as locomotion once the left edge of the window reaches the fifteenth frame  
157 (Figure 2C). These pruned labels were the final output of our grooming classification algorithm.

158 The accuracy of our algorithm was evaluated by comparing the computer-identified grooming with  
159 manually-labeled grooming identified by visual inspection. We tested a total of 8 hours of videos,  
160 including 15 individual flies (see Methods), and found that of the grooming events picked out by  
161 our algorithm, 92.1% were manually verified as true grooming events (Figure 2D, top panel).  
162 Furthermore, among all manually scored grooming events, 95.5% were successfully identified by  
163 our computational method (Figure 2D, bottom panel). These test results suggest that our method  
164 identifies grooming with high fidelity.

### 165 **Grooming plays an important role in the daily life of *Drosophila***

166 To determine how grooming is coordinated within the 24-hr period, we examined fly behavior over



167 the course of several days in 12 hour light: 12 hour dark (LD) conditions (Figure 3). In LD cycles  
168 (for constant darkness, see Figure S2A), locomotion levels showed the familiar morning (M) and  
169 evening (E) peaks around the time lights turn on and off (Figure 3A middle), respectively  
170 (Schlichting et al., 2016; Stoleru, Peng, Agosto, & Rosbash, 2004). Nearly coincident with  
171 increases in locomotion were increases in fly grooming (Figure 3A bottom), although these time-  
172 dependent peaks in grooming were more subdued compared to those in locomotion. While basal  
173 locomotion during mid-day or night decreases to < 5% of the M/E peak values, basal grooming  
174 during the same duration was maintained at ~14% of the peak values (Figure 3A, rectangles).  
175 The smaller time-dependent variations in grooming resulted from 20-40 bouts per hour with the  
176 longest pause between two bouts being ~83 minutes on average (Figure 3B). In contrast, the  
177 longest pause between two consecutive bouts of locomotion was ~116 minutes (Figure 3B).  
178 Because grooming bouts were on average shorter than locomotion (Figure 3C), a typical fly under  
179 LD conditions spent approximately 9% of its daily time grooming, compared to 20% of time in  
180 locomotion (Figure 3D). That is, the average fly spends ~30% of its active time grooming. The  
181 frequency of grooming behavior suggests that maintenance of a low but steady rate of grooming  
182 is important for the animal.

183 The reduced temporal modulations in individual grooming behavior was accompanied by similarly  
184 reduced variability in grooming levels between individual flies (Figure 3E). To compare variability  
185 of grooming and locomotion across the population, we constructed normalized distributions for  
186 the two behaviors by calculating daily grooming and locomotion times of individuals and dividing  
187 these by the respective population means. These data revealed that, under LD conditions, the  
188 standard deviations in grooming and locomotion were 0.14 and 0.34, respectively. Similarly, in  
189 constant darkness, they were 0.16 and 0.25 (Figure S2B). The relatively low individual variation  
190 in grooming behavior suggests a consistent, internally programmed drive to groom. Together, the  
191 considerable time spent and the low population-wide variability in grooming are consistent with

192 an important role for this behavior in the daily routine of *Drosophila melanogaster*.

193 To quantitatively compare the temporal patterns of grooming and locomotion (Figure 3F), we  
194 applied a previously developed mathematical function that models fly activity in terms of  
195 exponential functions (A. Lazopulo & Syed, 2016). The functions are defined by four rate  
196 parameters  $b_{MR}$ ,  $b_{MD}$ ,  $b_{ER}$  and  $b_{ED}$ , where subscripts denote morning rise (MR), morning decay  
197 (MD), evening rise (ER) and evening decay (ED), and two duration parameters that describe the  
198 relative durations of morning (TM) and evening (TE) peaks (Figure 3G). We previously proposed  
199 that these parameters may reflect kinetics of biochemical substrates underlying the specific fly  
200 behavior described by the model (A. Lazopulo & Syed, 2016). We fitted this model to grooming  
201 and locomotion of individual wild-type flies for 3-4 days in LD conditions. Results showed that the  
202 rate parameter  $b_{MR}$  of grooming was smaller than that of locomotion (8 out of 9 flies, Figure 3H),  
203 indicating a slower increase in night-time grooming activity and consistent with a smaller change  
204 in grooming between day and night (Figure S3A). Additionally, the evening duration parameter  
205 (TE) for grooming was greater than that for locomotion (Figure 3I), indicating that the evening  
206 peak in grooming lasted longer. In contrast, the other model parameters did not show significant  
207 differences between locomotion and grooming (Figure S3B-E), raising the possibility that, in  
208 addition to their differences, the two behaviors may also share some common underlying  
209 regulatory substrates.

## 210 **Temporal pattern of grooming is under control of the circadian clock**

211 The circadian clock modulates a wide range of fly behaviors (Allada & Chung, 2010), including  
212 locomotor activity. To test whether basal grooming is also under circadian control, we monitored  
213 grooming in wild-type (WT) and circadian mutants  $per^S$ ,  $per^L$ , and  $per^0$  for 4 days in LD followed  
214 by 4 days in constant darkness (DD, Figure 4A). Mutations of the endogenous circadian clock  
215 cause altered circadian period length or arrhythmia in the absence of light stimulation (DD).  $per^S$

216 and *per<sup>L</sup>* mutants have short and long circadian periods, respectively while *per<sup>0</sup>* mutants are  
217 arrhythmic. Population-averaged LD data showed that light was a strong zeitgeber of grooming  
218 even for circadian mutants, while the DD data revealed that grooming is circadian-regulated, as  
219 circadian mutants exhibited grooming behavior with the expected changes in periodicity (Figure  
220 4A, top three panels) or arrhythmia (Figure 4A, bottom panel). Autocorrelation analysis of wild-  
221 type LD data over a few hours showed weaker correlation in grooming compared to locomotor  
222 activity (Figure 4B), while spectral analyses showed oscillation periods in constant darkness to  
223 be  $23.73 \pm 1.10$  hours,  $18.70 \pm 0.71$  hours, and  $28.48 \pm 1.13$  hours for WT, *per<sup>S</sup>*, and *per<sup>L</sup>* flies,  
224 respectively (Figure 4C). In *per<sup>0</sup>* flies, grooming activity does not show any significant periodicities  
225 in spectral analysis (data not shown). These long time-scale oscillatory periods are in agreement  
226 with those of locomotor rhythms (Figure S2C, D). The observed shifts in the period of grooming  
227 rhythms, consistent with well-characterized molecular perturbations of the clock, suggest that the  
228 circadian clock temporally modulates grooming in *Drosophila*. Interestingly, *per<sup>S</sup>*, *per<sup>L</sup>*, and *per<sup>0</sup>*  
229 mutations cause major changes in temporal grooming rhythms while causing no significant  
230 change in the total level of grooming (Figure 4D). This result is consistent with at least two sets  
231 of regulatory mechanisms for basal or internally-programmed grooming: circadian regulation to  
232 regulate the timing of grooming, and an internal drive to regulate the amount of grooming.

233 Because *Drosophila* feeding activity is also regulated by the circadian clock (Chatterjee, Tanoue,  
234 Houl, & Hardin, 2010; Xu, Zheng, & Sehgal, 2008), we tested whether the observed rhythms in  
235 grooming could be an indirect effect of rhythmic food intake, with food debris serving as the  
236 external stimulus (Hempel et al., 2015; Seeds et al., 2014). Since our assay is not optimized to  
237 directly measure feeding, we used prolonged proximity (> 3 seconds, < body length) with food as  
238 an indication of feeding behavior (see Methods). This analysis demonstrated that, in LD  
239 conditions, wild-type controls exhibited robust oscillations in visits to food with a peak around 3  
240 hours after lights turn on (Figure 4E, top panel, blue). The peak time in contacting food was offset

241 by 2-4 hours from nearby peaks in grooming (Figure 4E, top panel, green). This temporal offset  
242 suggests that periodic contact with food is unlikely to be the external stimulus that drives rhythms  
243 in basal grooming. Locomotor rhythms are also unlikely to be the primary driver of grooming  
244 rhythms since the onset of evening peak in grooming was ~ 2 hours earlier than the evening peak  
245 in locomotion (Figure 4E, top panel, red boxes and inset). This is consistent with the comparison  
246 in Figure 3I, which shows that the grooming evening peak lasts longer than the locomotion  
247 evening peak. These temporal offsets in grooming, feeding and locomotion were typically reduced  
248 in constant darkness (Figure 4F) and nearly absent in *per<sup>0</sup>* mutants (Figure 4E, bottom panel;  
249 Figure 4F), suggesting that they result from a combined effect of the external zeitgeber and the  
250 internal pacemaker. Together, these results suggest that the circadian clock directly influences  
251 temporal patterns in grooming, thus identifying endogenous timekeeping as a likely internal  
252 program that influences the *Drosophila* grooming circuitry.

### 253 **Grooming duration is controlled by *cycle* and *clock***

254 The circadian clock appears to affect mainly the temporal pattern of grooming without altering the  
255 total time flies spend in the behavior (Figure 4D). Based on grooming data from other animals  
256 implicating the behavior in stress relief (Chen et al., 2010; Hart, 1988; Gabriele Schino et al.,  
257 1988), we hypothesized that flies with altered stress response may also exhibit altered levels of  
258 daily grooming when exposed to a common external stimulus.

259 The fly transcription factors CYCLE (CYC) and CLOCK (CLK) activate essential clock genes by  
260 binding E box sequences as a heterodimer (Crane & Young, 2014). Although they are best known  
261 for maintaining circadian rhythmicity, *cycle* and *clock* have also been implicated in regulating  
262 sleep need in response to sleep deprivation and adjusting locomotor output in response to nutrient  
263 unavailability (Hendricks et al., 2003; Keene et al., 2010; Shaw, Tononi, Greenspan, & Robinson,  
264 2002). To test if *cycle* or *clock* play a role in setting the level of grooming under normal LD  
265 conditions, we measured the behavior in *cyc<sup>01</sup>* (Rutila et al., 1998) and *clk<sup>Jrk</sup>* (Allada, White, So,

266 Hall, & Rosbash, 1998) mutants. The data showed increased daily average grooming in both  
267 mutants relative to genetic controls (Figure 5A, B). The shared increase in grooming duration in  
268 these flies is accompanied, however, by opposing changes in their locomotion. Relative to their  
269 controls, *cyc<sup>01</sup>* flies spent less time, while *clk<sup>Jrk</sup>* flies spent almost twice as much time in locomotion  
270 (Figure S4A, B). These results reveal a differential reprioritization of behavioral outputs by the two  
271 mutations, similar to phenotypic differences reported previously in sleep studies involving *cyc<sup>01</sup>*  
272 and *clk<sup>Jrk</sup>* (Hendricks et al., 2003; Shaw et al., 2002).

273 Because many different types of stress disrupt circadian regulation of locomotor activity, we next  
274 tested whether stress also disrupts circadian regulation of grooming behavior. We subjected *per<sup>0</sup>*,  
275 *cyc<sup>01</sup>*, *clk<sup>Jrk</sup>* mutants, and their controls to a common stressor: unavailability of nutrients. Previous  
276 work had shown that starvation causes loss of circadian regulation (Keene et al., 2010). Flies  
277 were allowed to acclimate to standard food and LD cycle for one day, after which grooming was  
278 recorded for the next three days with the second day either in normal food or 1% agarose.  
279 Consistent with the hypothesis that grooming behavior is circadian-regulated, we found that  
280 starvation disrupted circadian oscillations in grooming behavior, as well as locomotor activity, in  
281 wild-type flies (Figure S4C, D). Moreover, the starvation-induced disruption of circadian  
282 regulation is thought to result from the reprioritization of behavior: flies upregulate locomotor  
283 activity and downregulate sleep to engage in starvation-induced foraging behavior that overrides  
284 and is independent of circadian regulation (Keene et al., 2010). Consistent with this, all mutants  
285 and controls exhibited increased locomotor activity under starvation conditions (Figure S4C).

286 To test whether this reprioritization of behavior extended to grooming, we examined total levels  
287 of grooming under starvation conditions, as measured by total time spent grooming. We expected  
288 that grooming behavior would either be deprioritized relative to locomotor activity and down-  
289 regulated, similar to sleep, or increased relative to normal nutrient conditions, similar to locomotor  
290 activity, because flies are sleeping less and spending more time being active. Unexpectedly, we

291 found that starvation induced no significant change in time spent grooming in both *per<sup>0</sup>* mutants  
292 and control animals. This result supports the hypothesis that the daily time spent grooming is  
293 regulated by an internal program independent of circadian regulation and suggests that this  
294 internal program is resistant to starvation-induced stress.

295 This reprioritization of behavior is even more dramatic in two other circadian mutants *cyc<sup>01</sup>* and  
296 *clk<sup>Jrk</sup>*, both lacking a functional clock. Relative to controls or *per<sup>0</sup>* mutants, both *cyc<sup>01</sup>* and *clk<sup>Jrk</sup>*  
297 were previously shown to dramatically downregulate total sleep amount under starvation  
298 conditions, presumably by upregulating locomotor activity because of increased metabolic stress  
299 (Keene et al., 2010). Consistent with this, we found that *cyc<sup>01</sup>* and *clk<sup>Jrk</sup>* exhibited increased  
300 locomotor activity under starvation conditions (Figure S4C). We then tested whether this increase  
301 in metabolic stress was sufficient to deprioritize grooming behavior under starvation conditions.  
302 In support of this hypothesis, *clk<sup>Jrk</sup>* mutants under starvation conditions exhibited a modest  
303 decrease in time spent grooming relative to normal nutrient conditions (Figure 5C). Unexpectedly,  
304 however, *cyc<sup>01</sup>* exhibited the opposite response: a significant and robust increase in time spent  
305 grooming under starvation conditions. This increase in *cyc<sup>01</sup>* grooming mainly occurs during the  
306 first ~10 hours of their introduction to the agarose-diet (Figure 5D-F). There is at least another  
307 previously reported case in which *cyc<sup>01</sup>* mutants have a distinct phenotype relative to other  
308 circadian mutants: a disproportionately strong rebound in sleep after sleep deprivation, thought  
309 to result from defects in heat-shock stress response (Shaw et al., 2002). This suggests that the  
310 immediate, excessive grooming in response to starvation as exhibited by *cyc<sup>01</sup>* may also be due  
311 to defects in heat-shock stress response in the mutant. Taken together, our data show that while  
312 the internal drive to groom is not normally impacted by metabolic stress, the loss of the two  
313 circadian clock components *cyc* and *clk* increases the internal drive to groom (Figure 5A,B) and  
314 alters the grooming response to starvation conditions (Figure 5C). The opposite responses to  
315 starvation by *cyc<sup>01</sup>* and *clk<sup>Jrk</sup>* flies may be due to CLOCK or CYCLE interacting exclusively with

316 partners outside of those they bind as a heterodimer (Hendricks et al., 2003), one consequence  
317 of which may be aberrant expression of heat-shock genes in *cyc<sup>01</sup>* but not *clk<sup>Jrk</sup>* flies (Shaw et al.,  
318 2002).

319 To determine to what extent observed changes in grooming and locomotion affected the other  
320 behavioral classes, we next broadened our analysis to include rest, feeding, and sleep. Feeding  
321 was calculated in terms of extended period spent near food (as defined for Figure 4E) and sleep  
322 was determined in terms of prolonged rest,  $\geq 5$  min episodes of no grooming or locomotion (Shaw  
323 et al., 2002). The analysis revealed a general trend across all tested strains: lack of nutrients  
324 diminished time spent feeding and sleeping but increased time dedicated to short rests and  
325 locomotor activity (Figure 5G and Figure S5). Increase in rest time is surprising since re-allocation  
326 of time away from sleep (prolonged rest) time would predict a similar reduction in short rests. That  
327 flies instead spend more time resting during starvation implicates a sophisticated energy-balance  
328 mechanism that couples increase in locomotor activity, needed for foraging, with increase in short  
329 rests, presumably needed to improve efficiency in foraging expeditions.

330 Despite substantial reduction in sleep under starvation conditions, grooming levels were held  
331 approximately constant in all control and *per<sup>0</sup>* flies (Figure S5). This result shows that grooming  
332 behavior is prioritized above sleep during starvation, as time spent grooming could otherwise be  
333 spent sleeping or foraging. Stability in time spent grooming in the absence of food further supports  
334 the contention that much of the grooming detected in our experiments is not stimulated externally  
335 by food contact but rather controlled by internal programs. As noted above, lesions in *cyc* and *clk*  
336 affected this stability and resulted in elevated grooming (Figure 5A, B). Through the ethograms  
337 we found that in case of *cyc<sup>01</sup>*, the increase in grooming came from loss of locomotor activity while  
338 in case of *clk<sup>Jrk</sup>* the increase came from loss of sleep (Figure 5G). This result supports the  
339 hypothesis, now with more detail, that the *cyc<sup>01</sup>* and *clk<sup>Jrk</sup>* mutations alter the insect's internal  
340 homeostasis in distinct ways, which also helps explain why they exhibit starkly different responses

341 when placed under metabolic stress (Figure 5C, G).

342 Accumulated data from our experiments suggest that grooming is an innate fly behavior controlled  
343 by two major regulators. One of these regulators controls temporal patterns in grooming and  
344 another controls amount of time spent in grooming. Circadian genes *per*, *cyc* and *clk* are involved  
345 in controlling the timing of peaks/troughs in grooming rhythms while *cyc* and *clk* are also involved  
346 in setting how much time is spent grooming. The apparent absence of *per* from the second  
347 regulatory mechanism is consistent with the idea that the two control mechanisms are able to  
348 operate independently.

349

350



## 351 **Materials and methods**

### 352 **Fly strains**

353 Clock mutants *per<sup>S</sup>*, *per<sup>L</sup>*, and *per<sup>0</sup>* were backcrossed for five-six generations to an *iso31* with  
354 *mini-white* insertion strain. *cyc* mutants, gifts from William Ja (The Scripps Research Institute),  
355 have the *Canton S* background. *Clk<sup>Jrk</sup>* flies were backcrossed for five generations to *iso31*. Flies  
356 were bred and raised at 23°C and 40% relative humidity on standard cornmeal and molasses  
357 food. All experiments were done with 5-8 days old males at 26°C and 70-80% relative humidity in  
358 a custom-built behavior tracking chamber (Figure 1). For each experiment, control strain refers to  
359 the genetic background of a mutant. WT flies in Figure 3 refer to the *Canton S* line.

### 360 **Behavior tracking apparatus**

361 *Chamber.* Flies were placed individually in glass tubes (Trikinetics Inc., Waltham, MA, PGT5x65)  
362 with food and a cotton plug at opposite ends. Twenty tubes were placed on a custom-designed  
363 plate inside a transparent acrylic cuboid box for simultaneous imaging. Temperature and humidity  
364 were monitored every 5 mins with a digital thermometer (Dallas Semiconductor, Dallas, TX,  
365 DS18B20) and a humidity sensor (Honeywell, Morris Plains, NJ, HIH-4010), respectively, while a  
366 wet sponge inside the chamber kept the relative humidity around 70%-80% (Figure S1A).

367 *Illumination.* The chamber was illuminated by two sets of light-emitting diode (LED) strips. White  
368 LEDs (LEDwholesalers, Hayward, CA, 2026) producing ~700 lux were used to simulate daytime  
369 conditions and infrared LEDs (LEDLIGHTSWORLD, Bellevue, WA, SMD5050-300-IR 850nm)  
370 were used to visualize the flies at all time.

371 *Camera.* A CCD monochrome camera (The Imaging Source, Charlotte, NC, DMK-23U445) fitted  
372 with a varifocal lens (Computar, Cary, NC, T2Z-3514-CS) was used for video imaging. To  
373 minimize influence of chamber's light/dark conditions on video quality, we put a 780 nm long pass  
374 filter (Midopt, Palatine, IL, LP780-30.5) in front of the lens. Videos were saved as 8-bit images in

375 .avi format with 1280 x 960 resolution at 10 Hz and down-sampled as needed.

### 376 **Analytic hardware and runtime**

377 Using a desktop computer with Intel Core i7-4770 3.4 GHz processor and 4 x 4 G DDR3 1600  
378 MHz RAM, it takes ~7 hours to extract grooming, locomotion and rest data from an 8-hour video  
379 of 20 flies recorded in 10 Hz (in total 288000 frames) at 1280 pixel x 960 pixel resolution. Videos  
380 are analyzed every 2 frames (5 Hz), which is sufficient to capture grooming events.

### 381 **Starvation media**

382 Media for starvation experiments was made by dissolving 1% agarose in water.

### 383 **Algorithm for automatic detection of grooming**

384 All computational analyses were done with custom-written Matlab scripts that will be available at  
385 <http://syedlabmiami.weebly.com/software.html>

### 386 *Fly shape extraction*

387 Fly shape was extracted by applying a background subtraction algorithm as described below.

388 *Creating Background.* The background or reference frame is constructed by randomly picking two  
389 frames, a template and a contrast, and comparing their pixel grayscale values and erasing all  
390 moving objects from the template frame. To remove the fly from the template frame, we replace  
391 the pixels belonging to the fly with corresponding pixels from the contrast frame, relying on the  
392 fact that a fly is always darker than the surrounding objects. The template frame with no fly present  
393 then becomes the background frame. Additionally, because a fly's surroundings, including food  
394 debris, change substantially during the course of an experiment (Figure S1B), the background  
395 frame is regenerated every 1000 seconds. Lastly, if a fly occupies the same area in the template  
396 and contrast frames, the overlapping region cannot be erased on the template. To circumvent this  
397 problem, every time a background frame is generated, we randomly choose 7, instead of 1,

398 frames as contrast frames and compare all of them with the template. When a fly does not move  
399 for more than 1000 seconds, the fly will not be removed from the background and cannot be  
400 detected in other frames during this 1000 seconds. Thus when a fly is not detected, we consider  
401 the fly to be stationary at the position where it was last detected.

402 To reduce effects of charge coupled device (CCD) image noise and fluctuations in the system,  
403 we set a minimum change  $C_0$  as the threshold to accept grayscale changes from fly movements.  
404 We denote the grayscale value of a pixel located at  $(x, y)$  (in units of pixel, in our case,  $x \in [1:1280]$ ,  
405  $y \in [1:960]$ ) in the template as  $I_{template(x,y)}$  and in the contrast frame  $I_{contrast(x,y)}$ . Only if

$$406 \quad I_{template(x,y)} - I_{contrast(x,y)} > C_0$$

407 then

$$408 \quad I_{template(x,y)} = I_{contrast(x,y)}$$

409 While increasing threshold  $C_0$  reduces noise, it can also lead to rejection of real movements of  
410 the fly. To optimize  $C_0$ , we tested noise levels in our images by analyzing a three-hour video with  
411 dead flies. In the test, 30 pairs of consecutive frames were randomly chosen from the video and  
412 the differences between their corresponding grayscale pixel values were calculated. The  
413 distribution of the differences, stemming from noise, is shown in Figure S1C. Based on this  
414 distribution, we set  $C_0=10$ , which excludes 99.99% noise-related changes of grayscale values.

415 *Extracting fly shape.* To extract the shape of flies in a frame, the frame is compared with the  
416 background. If a given pixel is darker on this frame than on the background frame, with the  
417 difference of grayscale being greater than threshold  $C_0$ , then this pixel is temporarily assigned to  
418 the fly. That is, for pixel at location  $(x, y)$  if

$$419 \quad I_{current(x,y)} - I_{background(x,y)} > C_0,$$

420 then this pixel in the current frame belongs to a fly. Despite the use of  $C_0$ , some artifacts still  
421 remain in the extracted image in the form of small objects that do not belong to the fly. We  
422 eliminate these artefacts by erasing all closed objects with areas less than  $C_1 = 20$  pixels (Figure  
423 S1D), retaining only the fly silhouette (Figure S1E).

#### 424 *Feature extraction*

425 We use normalized periphery movement (PM), core movement (CM) and centroid displacement  
426 (CD) of a fly as features for behavior classification. PM and CM are defined as the number of non-  
427 overlapping periphery and core pixels, respectively, in two consecutive frames. CD is the change  
428 of a fly's centroid position between two frames.

429 *Splitting core and periphery.* To extract PM, CM and CD, we first split each fly's body into a core  
430 and a periphery. Based on the grayscale distributions of the two parts (Figure S1F), we set the  
431 median of pixel grayscale values as the criterion to split fly body into core (darker) and periphery  
432 (lighter). This criterion makes the sizes of core and periphery to be roughly equal so that features  
433 PM and CM have equal weight in the feature space. In addition, the grayscale distribution may  
434 differ between individual animals since the light condition varies slightly across the arena.  
435 Therefore, the median value is calculated separately for each fly. In the example shown in Figure  
436 S1F, median value equals 72.

437 *Centroid position.* We calculate centroid position of a fly from the binary image. Suppose  $(x_1, y_1)$ ,  
438  $(x_2, y_2), \dots (x_n, y_n)$  are all pixels of a fly. The centroid position is calculated from:

$$439 \quad (x, y) = \frac{\sum_{i=1}^n (x_i, y_i)}{n}$$

440 Since the tube is approximately one dimensional, when calculating centroid movement we  
441 generally ignore movements perpendicular to the long axis of the tube.

442 Noise may slightly change the centroid position even when a fly is stationary. Figure S1G shows

443 the distribution of such centroid displacements caused by noise. Based on this distribution, we  
444 set 0.5 pixel length to be the minimum actual displacement, that is, displacements smaller than  
445 0.5 pixel are ignored. As a result of applying this threshold, 99.66% of such false displacements  
446 are eliminated.

447 *Feature normalization.* Since PM and CM both represent areas (number of pixels in area), while  
448 CD represents distance, we take the square root of PM and CM to make the dimensions of the  
449 features homogeneous. In addition, fly size varies between individuals and across experimental  
450 settings. To facilitate comparison of data in feature space, we therefore normalize PM, CM and  
451 CD of each fly with a scale parameter SP equal to the square root of the area of that fly. Thus,  
452 the final form of normalized features are

453 
$$\text{Normalized PM} = \sqrt{PM}/SP$$

454 
$$\text{Normalized CM} = \sqrt{CM}/SP$$

455 
$$\text{Normalized CD} = CD/SP$$

456 *Orthogonality of features.* In *k*NN classifier, we use Euclidean distance to measure distance in  
457 feature space between samples. Usually orthogonal features are used for this metric. By applying  
458 principal component analysis (PCA) (Jolliffe, 2002) on training data, we converted raw features  
459 (normalized PM, CM and CD) into three uncorrelated orthogonal vectors as new features. We  
460 then compared performance of the *k*NN classifier with the orthogonal features and the raw  
461 features. Based on results from 10-fold cross validation (Bishop, 2007; McLachlan, Do, &  
462 Ambroise, 2005), we found that for *k* value in *k*NN varying from 1 to 50, using additional orthogonal  
463 features does not help improve the accuracy of the classifier (Figure S1H). Since the raw features  
464 have more biophysical meaning than orthogonal features and allow us to track differences  
465 between behaviors, we opted to use normalized PM, CM and CD as features for classification.

466

467

468 *Videos for Training and evaluating the kNN classifier*

469 To construct the classifier, we visually identified 9322 frames of grooming, 9930 frames of  
470 locomotion and 5748 frames of resting from video of 20 different flies. Frames were then mapped  
471 onto the 3 dimensional PM-CM-CD feature space and used as the training set for the kNN  
472 classifier.

473 To evaluate accuracy of the classifier, we first picked a total of 15 flies from three 8 hour videos,  
474 and manually verified the accuracy of grooming events identified by our algorithm. From these  
475 videos, we randomly selected ~30 minutes video of each fly (~450 minutes in total) and manually  
476 scored all grooming events in these selected videos to identify grooming events missed by our  
477 algorithm.

478 *Description of locomotion and rest behavioral classes*

479 Since the goal of this study was a general exploration of grooming rather than a detailed  
480 classification of all fly behaviors, behaviors with body centroid movement are approximated as  
481 locomotion. For instance, feeding as measured by the amount of time spent in contact with food  
482 was classified as locomotion. Because the fly does not frequently move its body during feeding,  
483 feeding only accounts for ~1-3% in locomotion. As a result, this approximation does not  
484 significantly impact our estimation of locomotion and contributes to a considerable speed-up of  
485 analysis.

486 Exceptions: In Figures 4E and 5G, we explore temporal correlation between grooming and contact  
487 with food. In these figure panels only, we treated food contact separately and not as a form of  
488 locomotion. Close proximity, a body length or less, to food for >3 seconds was taken as a proxy

489 for feeding behavior.

490 Except for Figures 5G and S5, rest is defined as a lack of grooming or locomotion behavior. In

491 Figure 5G and S5, sleep is isolated from rest and described as prolonged (> 5 minutes) rest bouts.

492 Rest other than sleep are denoted as short rest.

493

#### 494 **Data analysis**

495 Figure 4B: Locomotion and grooming for one day were binned every minute. Autocorrelation of

496 each behavior is calculated at lags from 0 to 240 minutes by step of one minute. Data shown in

497 figure is an average of 10 flies.

498 Figure 4C, Figure S2D: To measure periodicity in locomotion and grooming recordings, we

499 applied the Lomb-Scargle periodogram (S. Lazopulo, Lopez, Levy, & Syed, 2015; Scargle, 1982)

500 to time-series that were binned into 3-minute periods.

501

#### 502 **Statistics**

503 No sample size estimation was performed when the study was being designed. Unless otherwise

504 specified, quantitative experiments with statistical analysis have been repeated at least three

505 times independent. Exclusion of data applies to flies which are physically damaged (for example,

506 broken wings or legs), physically confined (for example, trapped by condensation inside tubes),

507 or dead during experiments. For testing statistical significance of differences between groups, we

508 first tested the normality of data by one-sample Kolmogorov-Smirnov test. Two-sample F-test is

509 applied for equal variances test. Samples with equal variances are compared with two-sample t-

510 test. Satterthwaite's approximation for the effective degrees of freedom is applied for samples

511 with unequal variances. Results were expressed as mean  $\pm$  s.d., unless otherwise specified.

512 \* $p < 0.05$ , \*\* $p < 0.01$ , \*\*\* $p < 0.001$  were considered statistically significant.



## 513 Discussion

514 Grooming continues to be one of the least understood *Drosophila* behaviors, possibly due to the  
515 technical challenges of detecting grooming events in this small insect. Early work describing fly  
516 grooming relied on manual scoring (Connolly, 1968; Szebenyi, 1969; Tinbergen, 1965), which  
517 imposes significant limitations on the length of events that can be detected, fidelity and objectivity  
518 of detection, and the level of detail that can be extracted from the data. Despite such limitations,  
519 these initial studies made a number of noteworthy observations. Szebenyi delineated all the major  
520 modes of fly grooming and suggested that repetitive grooming actions may closely follow a preset  
521 sequence (Szebenyi, 1969). A subsequent study in the blowfly offered a more refined mechanistic  
522 picture of insect grooming by proposing that the sequential actions form a hierarchical structure  
523 (Richard & Dawkins, 1976). Combining modern computational and genetic tools, an elegant study  
524 in *Drosophila* recently confirmed these previous hypotheses (Seeds et al., 2014). That fruit flies  
525 may groom spontaneously in the absence of any apparent stimulus has also been previously  
526 suggested (Connolly, 1968; Tinbergen, 1965). Consistent with this, our work provides evidence  
527 that fruit flies groom as part of their daily repertoire of internally programmed behaviors and often  
528 without any obvious external stimulus. Our analysis revealed that, while grooming over a period  
529 of minutes appears to be spontaneous and unstructured, over a period of hours this behavior is  
530 temporally structured by the fly circadian clock, with peaks in grooming activity around dawn and  
531 dusk. The study also identifies transcription factors CLOCK and CYCLE as critical molecular  
532 components that control the amplitude of programmed *Drosophila* grooming.

533 Machine-learning is increasingly gaining popularity due to its applicability to virtually any problem  
534 involving pattern classification, including in studies aimed at deconstructing stereotyped behavior  
535 in the fruit fly (Branson et al., 2009; Kabra et al., 2013; Kain et al., 2013; Mendes et al., 2013;  
536 Valletta, Torney, Kings, Thornton, & Madden, 2017). Similar to these recent efforts, we  
537 constructed a computational pipeline incorporating elements of machine learning to automatically

538 identify grooming events in video recordings of behaving flies. Our approach relies, in particular,  
539 on a supervised  $k$ -nearest neighbors algorithm to broadly classify behavior into grooming,  
540 locomotion and rest (Figure 2). Application of additional optional filters yields approximate data  
541 on feeding and sleep (Figure 4D, Figure 5G). While previous methods offer important details on  
542 different modes of grooming (Seeds et al., 2014), leg movements (Kain et al., 2013; Mendes et  
543 al., 2013), and fly-fly interactions (Branson et al., 2009; Kabra et al., 2013) from short videos, they  
544 demand prohibitive set-up time and computational resources for interpreting multi-day recordings.  
545 The method presented here offers less detail on modes of grooming, but can instead readily  
546 dissect circadian time-scale recordings into three-five behavioral classes on a typical personal  
547 computer.

548 The apparatus used in this method (Figure 1) also offers a number of advantages over current  
549 ones. First, most items used in the apparatus are standard in a typical fly circadian experiment,  
550 significantly lowering technical hurdles for other investigators to carry out similar studies. Most  
551 current grooming methods require specialized equipment for fly stimulation and detection (Seeds  
552 et al., 2014), elaborate optics, and multiple CCD cameras (Kain et al., 2013), or pre-labeled flies  
553 and a specific form of fluorescence microscopy (Mendes et al., 2013). Second, our apparatus can  
554 simultaneously monitor up to ~20 flies, while the existing approaches, though offering higher-  
555 resolution data, can monitor only one animal at a time. The scalability and high-throughput nature  
556 of our platform should appeal to investigators interested in, for example, large-scale genetic  
557 studies to identify mechanisms that differentially affect grooming, locomotion and rest (King et al.,  
558 2016). Finally, the flies in our apparatus are allowed to move freely over a distance roughly 10  
559 times their body length and still remain in the camera's field of view. Apparati used in other studies  
560 either constrain flies by a tether (Kain et al., 2013; Seeds et al., 2014) or permit limited  
561 visualization of behavior over short distances (Mendes et al., 2013). The relative freedom of  
562 mobility, access to food, and long time-scales of observation offered by our apparatus thus

563 facilitate analysis of basal, internally programmed behavior.

564 These properties make our platform amenable to addressing questions of biological relevance,  
565 such as the importance of grooming behavior, its temporal regulation, dependence on the  
566 circadian timekeeping system, and relationship to stress. First, we found that flies consistently  
567 devote a significant fraction of time to grooming behavior during periods of locomotor activity  
568 (30%), and surprisingly, that grooming behavior is observed even during periods of reduced  
569 locomotor activity (Figure 3A). This suggests that the benefits of grooming outweigh the caloric  
570 resources expended and the resulting interruption of rest. Second, we show that daily grooming  
571 behavior, as measured by length of time spent grooming, varies less between individual flies than  
572 does locomotor activity (Figure 3E). Both of these findings underscore the hypothesis that daily  
573 grooming is a fundamental behavior of *Drosophila*.

574 A few recent studies (Hampel et al., 2015; Phillis et al., 1993; Seeds et al., 2014) have shown that  
575 fly grooming can be directly induced by peripheral stimuli, and there has been considerable  
576 progress toward identifying the behavioral and neural aspects of such stimulus-induced grooming.  
577 However, programmed grooming, or grooming in the absence of a macroscopic stimulus, remains  
578 relatively understudied in *Drosophila*. To our knowledge, the existence of programmed grooming,  
579 first proposed in the mid 60's, still remains unreported.

580 Data from this study suggest that a significant portion of daily fly grooming is driven by internal  
581 programs. Flies in our experiments are active for ~34% of the time within a 24-hour period, during  
582 which they mostly engage in grooming, locomotion and feeding. Behavioral analysis shows that,  
583 like locomotion and feeding, grooming behavior is modulated by oscillations of the circadian clock  
584 (Figure 4). This finding raised the possibility that the observed grooming was stimulated by  
585 rhythms in contact with food or locomotor activity. However, closer examination revealed that  
586 peak in feeding activity is separated by several hours from peaks in grooming (Figure 4) and, in  
587 most cases (control and *per<sup>0</sup>* flies) amount of grooming remained relatively unchanged even when

588 flies did not have access to food (Figure 5). Similarly, grooming and locomotor peaks are  
589 temporally well separated (Figure 4) and detailed examination also revealed differences in kinetic  
590 parameters underlying bout lengths and temporal patterns of grooming and locomotion (Figure  
591 3). Additionally, genetic modifications and altered nutrient conditions resulted in contrasting  
592 changes in grooming, locomotion, and feeding (Figure 5, Figure S4). Finally, comparison of  
593 grooming in light vs. dark revealed no major differences in the fraction of daily time flies spent  
594 grooming (Figure 4D). These results together suggest that the majority of grooming events  
595 detected in our experiments are not triggered by external stimuli such as light, food, and locomotor  
596 movements. Rather, internal regulatory mechanisms, independent of external stimuli, likely drive  
597 this programmed behavior.

598 Multi-day recordings of wild-type flies in constant darkness showed 24-hour rhythms in daily  
599 grooming patterns. Furthermore, these rhythms were shifted appropriately in the canonical clock  
600 mutants *per<sup>L</sup>* and *per<sup>S</sup>* and abolished in the arrhythmic *per<sup>0</sup>* flies (Figure 4). These data support a  
601 regulatory model in which timing of programmed grooming behavior is orchestrated by the  
602 circadian clock. Notably, since these genetic perturbations did not significantly affect the amount  
603 of grooming (Figure 4D), our results suggest that the primary role of the clock is to organize the  
604 behavior in time without influencing the total time flies dedicate to grooming.

605 Intriguingly, two other circadian mutations, *cyc<sup>01</sup>* and *clk<sup>Jrk</sup>*, increased the proportion of daily time  
606 flies spend grooming (Figure 5A, B). *cyc<sup>01</sup>* flies also showed increased grooming under conditions  
607 of nutrient shortage, while *clk<sup>Jrk</sup>* flies showed decreased grooming under the same conditions.  
608 Importantly, neither change in grooming was observed in wild-type or *per<sup>0</sup>* flies (Figure 5C),  
609 implying that the changes in grooming level are not due to circadian defects. Instead, the data  
610 imply that clock-independent but *cyc*- and *clk*- dependent pathways regulate the amount of  
611 programmed grooming behavior under normal conditions, in response to starvation, and  
612 potentially in response to other changes in the insect's internal homeostasis.

613 Since both locomotion and short rest increase under starvation conditions (Figure 5G, Figure S5),  
614 it is plausible that in such situations, obtaining food is more important for survival than grooming  
615 and sleep. It may benefit the animal to have a mechanism that adjusts behavioral output to divert  
616 energy towards foraging, with *cyc* and *clk* or their products playing important roles in this  
617 regulation. This would be consistent with our observations of WT strains in starvation conditions,  
618 wherein the amount of programmed grooming remains constant despite dramatic changes in  
619 locomotion and sleep. It would also be consistent with our observations of *cyc*<sup>01</sup> and *clk*<sup>Jrk</sup> flies,  
620 which show altered grooming when nutrients are unavailable, presumably due to defective  
621 regulation of behavioral output. Differences in starvation-induced changes between *cyc*<sup>01</sup> and  
622 *clk*<sup>Jrk</sup> flies suggest an additional mechanistic detail regarding the *cyc*- and *clk*-mediated pathways.  
623 When subjected to sleep deprivation, *cyc*<sup>01</sup> but not *clk*<sup>Jrk</sup> flies, dramatically lower expression of  
624 heat-shock genes, and show excessive homeostatic rebound (Shaw et al., 2002). In the present  
625 context, these prior data raise the possibility that heat-shock genes might also be part of the *cyc*<sup>01</sup>  
626 and *clk*<sup>Jrk</sup> dependent grooming response pathways that are activated by starvation.

627 Finally, why are flies innately programmed to groom? The present study does not directly address  
628 this important question, but given that microscopic pathogens can sporulate on the fly cuticle and  
629 eventually infect the insect (Leger, Wang, & Fang, 2011), persistent grooming may serve as a  
630 first line of defense against such attack. Thus, the immune system may constitute another internal  
631 program, similar to the *cyc* and *clk*-controlled mechanisms, that drives fly grooming; if so, we  
632 hypothesized that mutants with defective immune response may exhibit altered grooming  
633 behavior (Lemaitre et al., 1995; Michel, Reichhart, Hoffmann, & Royet, 2001). Consistent with this,  
634 we found that grooming was reduced in the immune deficient *imd* mutant (Figure S6A), though a  
635 second immune deficient strain lacking a member of the Toll pathway (*PGRP-SA*<sup>semi</sup>) showed only  
636 a modest decrease (Figure S6A). Further studies are required to clarify these initial results and  
637 elucidate the biological function of programmed grooming in *Drosophila*.

638 Together, the data provide strong supporting evidence for programmed grooming in *Drosophila*  
639 and suggest that this innate behavior is driven by two distinct sets of regulatory systems. The  
640 circadian system temporally segregates undulations in grooming from those of other essential  
641 behavioral outputs like feeding and sleep. Circadian coordination of grooming underscores a  
642 previously under-appreciated importance of this behavior in the daily routine of the fruit fly. The  
643 second regulatory system adjusts the level of grooming relative to other behaviors. This set of  
644 regulation likely confers adaptability on the animal by allowing it to up- or downregulate grooming  
645 as necessitated by internal and external conditions. The dual control mechanism of grooming  
646 proposed here is highly reminiscent of the two-process framework--- circadian and homeostatic-  
647 -- that is widely used in understanding sleep regulation (Borbély, 1982). Although this work has  
648 not demonstrated grooming is under homeostatic control, future studies could be aimed at better  
649 characterizing the nature of the non-circadian regulatory system of fly grooming.

650 In summary, we present here a new platform to detect innate grooming behavior simultaneously  
651 and for days at a time in multiple individual fruit flies. The apparatus can be assembled easily,  
652 and the accompanying analytics is available publicly. Utilizing this platform, we report several  
653 mechanisms that are potentially responsible for driving the timing and level of programmed  
654 grooming in *Drosophila*. We also suggest future experiments that through use of this platform can  
655 lead to deeper understanding of the underlying biology of grooming and its relation to other  
656 essential fly behaviors.

657

## 658 **Acknowledgements**

659 This work was partially supported by the National Science Foundation under grant IOS-1656603  
660 to S.S. and by National Institutes of Health grants R01GM105775 and R01AG045842 to M.M.S.H.  
661 The authors are grateful to Michael Young and William Ja for providing fly strains, Juan Lopez

662 and Manuel Collazo for technical support and Stanislav Lazopulo and Andrey Lazopulo for  
663 suggestions and assistance with experiments. We thank Alan Li and Gadi Trocki for helpful  
664 comments on the manuscript.

665

666

## 667 **References**

- 668 Allada, R., & Chung, B. Y. (2010). Circadian organization of behavior and physiology in  
669 *Drosophila*. *Annual Review of Physiology*, 72, 605–24. [http://doi.org/10.1146/annurev-](http://doi.org/10.1146/annurev-physiol-021909-135815)  
670 [physiol-021909-135815](http://doi.org/10.1146/annurev-physiol-021909-135815)
- 671 Allada, R., White, N. E., So, W. V., Hall, J. C., & Rosbash, M. (1998). A mutant *Drosophila*  
672 homolog of mammalian Clock disrupts circadian rhythms and transcription of period and  
673 timeless. *Cell*, 93(5), 791–804. [http://doi.org/10.1016/S0092-8674\(00\)81440-3](http://doi.org/10.1016/S0092-8674(00)81440-3)
- 674 Bergman, C. M., Schaefer, J. A., & Luttich, S. N. (2000). Caribou movement as a correlated  
675 random walk. *Oecologia*, 123(3), 364–374. <http://doi.org/10.1007/s004420051023>
- 676 Bishop, C. M. (2007). *Pattern Recognition and Machine Learning*. Springer.
- 677 Borbély, A. A. (1982). A two process model of sleep regulation. *Human Neurobiology*, 1(3), 195-  
678 204.
- 679 Branson, K., Robie, A. A., Bender, J., Perona, P., & Dickinson, M. H. (2009). High-throughput  
680 ethomics in large groups of *Drosophila*. *Nature Methods*, 6(6), 451–457.  
681 <http://doi.org/10.1038/nmeth.1328>
- 682 Chatterjee, A., Tanoue, S., Houl, J. H., & Hardin, P. E. (2010). Regulation of Gustatory  
683 Physiology and Appetitive Behavior by the *Drosophila* Circadian Clock. *Current Biology*,  
684 20(4), 300–309. <http://doi.org/10.1016/j.cub.2009.12.055>
- 685 Chen, S., Tvrdik, P., Peden, E., Cho, S., Wu, S., Spangrude, G., & Capecchi, M. R. (2010).  
686 Hematopoietic Origin of Pathological Grooming in Hoxb8 Mutant Mice. *Cell*, 141(5), 775–  
687 785. <http://doi.org/10.1016/j.cell.2010.03.055>
- 688 Connolly, K. (1968). The social facilitation of preening behaviour in *Drosophila melanogaster*.



- 689 *Animal Behaviour*, 16(2), 385–391. [http://doi.org/10.1016/0003-3472\(68\)90023-7](http://doi.org/10.1016/0003-3472(68)90023-7)
- 690 Crane, B. R., & Young, M. W. (2014). Interactive features of proteins composing eukaryotic  
691 circadian clocks. *Annual Review of Biochemistry*, 83, 191–219.  
692 <http://doi.org/10.1146/annurev-biochem-060713-035644>
- 693 Ferkin, M. H., Leonard, S. T., Heath, L. A., & Paz-y-Miño, C. G. (2001). Self-grooming as a  
694 tactic used by prairie voles *Microtus ochrogaster* to enhance sexual communication.  
695 *Ethology*, 107(10), 939–949. <http://doi.org/10.1046/j.1439-0310.2001.00725.x>
- 696 Geist, Valerius. Walther, F. (1974). The behaviour of ungulates and its relation to management.  
697 *I.U.C.N. Publication*, 24, 1–194.
- 698 Gilestro, G. F. (2012). Video tracking and analysis of sleep in *Drosophila melanogaster*. *Nature*  
699 *Protocols*, 7(5), 995–1007. <http://doi.org/10.1038/nprot.2012.041>
- 700 Hampel, S., Franconville, R., Simpson, J. H., & Seeds, A. M. (2015). A neural command circuit  
701 for grooming movement control. *eLife*, 4(September), 1–26.  
702 <http://doi.org/10.7554/eLife.08758>
- 703 Hart, B. L. (1988). Biological basis of the behavior of sick animals. *Neuroscience &*  
704 *Biobehavioral Reviews*, 12(2), 123–137. [http://doi.org/10.1016/S0149-7634\(88\)80004-6](http://doi.org/10.1016/S0149-7634(88)80004-6)
- 705 Hart, B. L., Hart, L. A., Mooring, M. S., & Olubayo, R. (1992). Biological basis of grooming  
706 behaviour in antelope: the body-size, vigilance and habitat principles. *Animal Behaviour*,  
707 44(4), 615–631. [http://doi.org/10.1016/S0003-3472\(05\)80290-8](http://doi.org/10.1016/S0003-3472(05)80290-8)
- 708 Hawlena, H., Bashary, D., Abramsky, Z., Khokhlova, I. S., & Krasnov, B. R. (2008).  
709 Programmed versus stimulus-driven antiparasitic grooming in a desert rodent. *Behavioral*  
710 *Ecology*, 19(5), 929–935. <http://doi.org/10.1093/beheco/arn046>
- 711 Hendricks, J. C., Lu, S., Kume, K., Yin, J. C., Yang, Z., & Sehgal, A. (2003). Gender dimorphism

- 712 in the role of cycle (BMAL1) in rest, rest regulation, and longevity in *Drosophila*  
713 *melanogaster*. *Journal of Biological Rhythms*, 18(1), 12–25.  
714 <http://doi.org/10.1177/0748730402239673>
- 715 Jolliffe, I. (2002). *Principal component analysis*. Wiley Online Library.
- 716 Kabra, M., Robie, A. A., Rivera-Alba, M., Branson, S., & Branson, K. (2013). JAABA: interactive  
717 machine learning for automatic annotation of animal behavior. *Nature Methods*, 10(1), 64–  
718 67. <http://doi.org/10.1038/nmeth.2281>
- 719 Kain, J., Stokes, C., Gaudry, Q., Song, X., Foley, J., Wilson, R., & de Bivort, B. (2013). Leg-  
720 tracking and automated behavioural classification in *Drosophila*. *Nature Communications*,  
721 4, 1910. <http://doi.org/10.1038/ncomms2908>
- 722 Keene, A. C., Duboué, E. R., McDonald, D. M., Dus, M., Suh, G. S., Waddell, S., & Blau, J.  
723 (2010, July). Clock and cycle limit starvation-induced sleep loss in *Drosophila*. *Current*  
724 *Biology*. <http://doi.org/10.1016/j.cub.2010.05.029>
- 725 King, L. B., Koch, M., Murphy, K., Velazquez, Y., William, W. J., & Tomchik, S. M. (2016).  
726 Neurofibromin Loss of Function Drives Excessive Grooming in *Drosophila*. *Genes/*  
727 *Genomes/ Genetics*, 6, 1083--1093. <http://doi.org/10.1534/g3.115.026484>
- 728 Lazopulo, A., & Syed, S. (2016). A mathematical model provides mechanistic links to temporal  
729 patterns in *Drosophila* daily activity. *BMC Neuroscience*, 17(1), 14.  
730 <http://doi.org/10.1186/s12868-016-0248-9>
- 731 Lazopulo, S., Lopez, J. A., Levy, P., & Syed, S. (2015). A stochastic burst follows the periodic  
732 morning peak in individual *Drosophila* locomotion. *PLoS ONE*, 10(11), 1–17.  
733 <http://doi.org/10.1371/journal.pone.0140481>
- 734 Leger, R. J., Wang, C., & Fang, W. (2011). New perspectives on insect pathogens. *Fungal*

- 735 *Biology Reviews*, 25(2), 84–88. <http://doi.org/10.1016/j.fbr.2011.04.005>
- 736 Lemaitre, B., Kromer-Metzger, E., Michaut, L., Nicolas, E., Meister, M., Georgel, P., ...  
737 Hoffmann, J. A. (1995). A recessive mutation, immune deficiency (imd), defines two distinct  
738 control pathways in the Drosophila host defense. *Proceedings of the National Academy of*  
739 *Sciences*, 92(21), 9465–9469. <http://doi.org/10.1073/pnas.92.21.9465>
- 740 McKenna, J. J. (1978). Biosocial functions of grooming behavior among the common Indian  
741 langur monkey (*Presbytis entellus*). *American Journal of Physical Anthropology*, 48(4),  
742 503–509. <http://doi.org/10.1002/ajpa.1330480409>
- 743 McLachlan, G., Do, K. A., & Ambrose, C. (2005). *Analyzing microarray gene expression data*  
744 (Vol. 422). John Wiley & Sons.
- 745 Mendes, C. S., Bartos, I., Akay, T., Márka, S., & Mann, R. S. (2013). Quantification of gait  
746 parameters in freely walking wild type and sensory deprived *Drosophila melanogaster*.  
747 *eLife*, 2, e00231. <http://doi.org/10.7554/eLife.00231>
- 748 Michel, T., Reichhart, J. M., Hoffmann, J. A., & Royet, J. (2001). *Drosophila* Toll is activated by  
749 Gram-positive bacteria through a circulating peptidoglycan recognition protein. *Nature*,  
750 414(6865), 756–759. <http://doi.org/10.1038/414756a>
- 751 Mooring, M. S., Blumstein, D. T., & Stoner, C. J. (2004). The evolution of parasite-defence  
752 grooming in ungulates. *Biological Journal of the Linnean Society*, 81(1), 17–37.  
753 <http://doi.org/10.1111/j.1095-8312.2004.00273.x>
- 754 Mooring, M. S., & Samuel, W. M. (1998). The biological basis of grooming in moose:  
755 programmed versus stimulus-driven grooming. *Animal Behaviour*, 56(6), 1561–1570.  
756 <http://doi.org/10.1006/anbe.1998.0915>
- 757 Oswald, D., Lin, S., & Waddell, S. (2015). Light, heat, action: neural control of fruit fly behaviour.

- 758 *Philosophical Transactions of the Royal Society B, Biological Sciences*, 370(1677),  
759 20140211. <http://doi.org/10.1098/rstb.2014.0211>
- 760 Patenaude, F., & Bovet, J. (1984). Self-grooming and social grooming in the North American  
761 beaver, *Castor canadensis*. *Canadian Journal of Zoology*, 62(9), 1872–1878.  
762 <http://doi.org/10.1139/z84-273>
- 763 Pfeiffenberger, C., Lear, B. C., Keegan, K. P., & Allada, R. (2010). Locomotor Activity Level  
764 Monitoring Using the Drosophila Activity Monitoring (DAM) System. *Cold Spring Harbor*  
765 *Protocols*, 2010(11), pdb.prot5518. <http://doi.org/10.1101/pdb.prot5518>
- 766 Phillis, R. W., Bramlage, A. T., Wotus, C., Whittaker, A., Gramates, L. S., Seppala, D., ...  
767 Murphey, R. K. (1993). Isolation of Mutations Affecting Neural Circuitry Required for  
768 Grooming Behavior in *Drosophila melanogaster*. *Genetics*, 133, 581–592.
- 769 Richard, & Dawkins, M. (1976). Hierarchical organization and postural facilitation: Rules for  
770 grooming in flies. *Animal Behaviour*, 24(4), 739–755. [http://doi.org/10.1016/S0003-](http://doi.org/10.1016/S0003-3472(76)80003-6)  
771 [3472\(76\)80003-6](http://doi.org/10.1016/S0003-3472(76)80003-6)
- 772 Rutila, J. E., Suri, V., Le, M., So, W. V., Rosbash, M., & Hall, J. C. (1998). CYCLE is a second  
773 bHLH-PAS clock protein essential for circadian rhythmicity and transcription of *Drosophila*  
774 period and timeless. *Cell*, 93(5), 805–814. [http://doi.org/10.1016/S0092-8674\(00\)81441-5](http://doi.org/10.1016/S0092-8674(00)81441-5)
- 775 Sachs, B. D. (1988). The development of grooming and its expression in adult animals. *Annals*  
776 *of the New York Academy of Sciences*, 525, 1–17. [http://doi.org/10.1111/j.1749-](http://doi.org/10.1111/j.1749-6632.1988.tb38591.x)  
777 [6632.1988.tb38591.x](http://doi.org/10.1111/j.1749-6632.1988.tb38591.x)
- 778 Scargle, J. D. (1982). Studies in astronomical time series analysis. II - Statistical aspects of  
779 spectral analysis of unevenly spaced data. *The Astrophysical Journal*, 263, 835–853.  
780 <http://doi.org/10.1086/160554>

- 781 Schino, G. (2001). Grooming, competition and social rank among female primates: a meta-  
782 analysis. *Animal Behaviour*, 62, 265–271. <http://doi.org/10.1006/anbe.2001.1750>
- 783 Schino, G., Scucchi, S., Maestripieri, D., & Turillazzi, P. G. (1988). Allogrooming as a tension-  
784 reduction mechanism: A behavioral approach. *American Journal of Primatology*, 16(1), 43–  
785 50. <http://doi.org/10.1002/ajp.1350160106>
- 786 Schlichting, M., Menegazzi, P., Lelito, K. R., Yao, Z., Buhl, E., Dalla Benetta, E., ... Shafer, O.  
787 T. (2016). A Neural Network Underlying Circadian Entrainment and Photoperiodic  
788 Adjustment of Sleep and Activity in *Drosophila*. *The Journal of Neuroscience*, 36(35),  
789 9084–96. <http://doi.org/10.1523/JNEUROSCI.0992-16.2016>
- 790 Seeds, A. M., Ravbar, P., Chung, P., Hampel, S., Midgley, F. M., Mensh, B. D., & Simpson, J.  
791 H. (2014). A suppression hierarchy among competing motor programs drives sequential  
792 grooming in *Drosophila*. *eLife*, 3, e02951. <http://doi.org/10.7554/eLife.02951>
- 793 Seyfarth, R. M. (1977). A model of social grooming among female monkeys. *Journal of*  
794 *Theoretical Biology*, 65(4), 671–698. [http://doi.org/10.1016/0022-5193\(77\)90015-7](http://doi.org/10.1016/0022-5193(77)90015-7)
- 795 Shaw, P. J., Tononi, G., Greenspan, R. J., & Robinson, D. F. (2002). Stress response genes  
796 protect against lethal effects of sleep deprivation in *Drosophila*. *Nature*, 417(6886), 287–  
797 291. <http://doi.org/10.1038/417287a>
- 798 Sproull, R. F. (1991). Refinements to nearest-neighbor searching in k-dimensional trees.  
799 *Algorithmica*, 6(1), 579–589. <http://doi.org/10.1007/BF01759061>
- 800 Spruijt, B. M., van Hooff, J. A., & Gispen, W. H. (1992). Ethology and neurobiology of grooming  
801 behavior. *Physiological Reviews*, 72(3), 825–852.
- 802 Stoleru, D., Peng, Y., Agosto, J., & Rosbash, M. (2004). Coupled oscillators control morning and  
803 evening locomotor behaviour of *Drosophila*. *Nature*, 431(7010), 862–868.

- 804 <http://doi.org/10.1038/nature02926>
- 805 Szebenyi, A. L. (1969). Cleaning Behaviour In *Drosophila Melanogaster*. *Animal Behaviour*,  
806 17(1), 641–651. [http://doi.org/10.1016/S0003-3472\(69\)80006-0](http://doi.org/10.1016/S0003-3472(69)80006-0)
- 807 Thiessen, D. D., Graham, M., Perkins, J., & Marcks, S. (1977). Temperature regulation and  
808 social grooming in the Mongolian gerbil (*Meriones unguiculatus*). *Behavioral Biology*, 19(3),  
809 279–88. [http://doi.org/10.1016/S0091-6773\(77\)91579-6](http://doi.org/10.1016/S0091-6773(77)91579-6)
- 810 Tinbergen, N. (1965). *Animal behavior*. Time Incorporated.
- 811 Valletta, J. J., Torney, C., Kings, M., Thornton, A., & Madden, J. (2017). Applications of machine  
812 learning in animal behaviour studies. *Animal Behaviour*, 124, 203–220.  
813 <http://doi.org/10.1016/j.anbehav.2016.12.005>
- 814 Walther, F. R. (1984). *Communication and expression in hoofed mammals*. Indiana University  
815 Press.
- 816 Xu, K., Zheng, X., & Sehgal, A. (2008). Regulation of feeding and metabolism by neuronal and  
817 peripheral clocks in *Drosophila*. *Cell Metabolism*, 8(4), 289–300.  
818 <http://doi.org/10.1016/j.cmet.2008.09.006>
- 819 Yanagawa, A., Guigue, A. M. a, & Marion-Poll, F. (2014). Hygienic grooming is induced by  
820 contact chemicals in *Drosophila melanogaster*. *Frontiers in Behavioral Neuroscience*, 8,  
821 254. <http://doi.org/10.3389/fnbeh.2014.00254>
- 822
- 823
- 824

825 **Figure captions**

826 **Figure 1 Overview of approach for detecting *Drosophila* grooming**

827 (A) Apparatus used in recording behavior. Flies constrained to individual tubes, are continuously  
828 illuminated by infrared light from below and recorded by a digital camera from above. LED  
829 lights on sides of chamber simulate day-night light conditions. Temperature and humidity  
830 probes placed in the chamber are monitored by a computer. Inset: A photo of fly tubes in  
831 chamber as seen by the camera.

832 (B) Examples of the most commonly observed types of grooming in our experiments. The top row  
833 displays postures of a fly in inactive state. The three rows below show how the limbs and body  
834 of a fly coordinate to perform specific grooming movements. Arrows point to the moving part  
835 during grooming.

836 (C) Flowchart of our algorithm used to classify fly behavior. After generating a suitable background  
837 image, the algorithm characterizes movements of fly center (CD), core (CM) and periphery  
838 (PM) to fully classify behavior in each frame.

839

840 **Figure 2 Feature extraction and behavior classification**

- 841 (A) Examples of original and processed images of a fly displaying different behaviors: Top, left:  
842 front leg grooming; top, right: wing grooming; bottom, left: resting; bottom, right: locomoting.  
843 In each panel, original images from two consecutive frames are shown on left, periphery in  
844 the middle and core on the right. Changes of periphery and core are shown in the bottom  
845 row. PM and CM denote differences in the number of pixels representing the fly periphery  
846 and core, respectively, in two frames. Features PM and CM are different for different  
847 behaviors. Rubbing of front legs manifests through PM (top, left) while sweeping wings affects  
848 PM and CM (top, right)
- 849 (B) *k*-nearest neighbors (*k*NN) algorithm works by placing an unclassified sample (black circle)  
850 representing a frame into a feature space with pre-labeled samples (red/green/blue circles,  
851 the training set). The label of the unclassified point is decided by the most frequent label  
852 among its *k*-nearest neighbors. The three axes of the feature space are normalized periphery  
853 movement (PM), core movement (CM), and center displacement (CD). Fly activity in the  
854 feature space is separated into three regions: grooming (red), locomotion (green) and resting  
855 (blue). Training samples (N=18000 for each color) and 9 unlabeled samples in PM-CM-CD  
856 space are shown.
- 857 (C) Grooming data are pruned after identification by the *k*NN classifier. A frame is finally labeled  
858 as grooming only if this frame is in a group of 15 frames in which 12 or more were labeled as  
859 grooming by the classifier. Frame previously labeled as grooming by the classifier but that  
860 did not pass the pruning procedure is relabeled as locomotion.
- 861 (D) (Top) 92% time of all grooming detected by the program is correct. We randomly sampled  
862 10% of all grooming classified by our algorithm in an eight-hour video, and then manually  
863 determined the false positive rate by watching the video. The false detection (red) results



864 from movements that are similar to grooming, such as slow body displacement and bending  
865 of the abdomen and mouth. (Bottom) Our algorithm successfully detects 95.5% of all  
866 grooming in a video (bottom). The circle represents all the grooming in a 460 minutes video  
867 and the green area represents grooming detected by the program.

868

869 **Figure 3 How grooming fits into the daily routine of a fly.**

870 (A) Position within the tube (top row), locomotion (middle) and grooming (bottom) of a single fly  
871 during four days in LD cycles. Locomotion is shown in terms of the duration (minutes) spent in  
872 locomotion in five minute bins. Morning and evening peaks in locomotor activity are marked as M  
873 and E. Grooming is shown in terms of time spent grooming (minutes) in five minute bins.  
874 White/black bars indicate light/dark environmental conditions, respectively.

875 (B) Longest intervals between grooming events (green) and between locomotion events (black).  
876 Each point represents an individual fly recorded for a day.  $N=74$  flies,  $p=7.09 \times 10^{-5}$

877 (C) Probability density of the duration of grooming events (green) and locomotion events (black).  
878  $N=20$  flies.

879 (D) Fraction of time spent in grooming, locomotion and resting states in WT flies. On average,  
880 flies spend about 9% of time grooming every day and 20% time in locomotion.  $N=66$  flies.

881 (E) Inter-individual differences in daily grooming and locomotion. Normalized distributions of  
882 individual grooming and locomotion (total individual daily grooming or locomotion divided by  
883 population average) are fitted to normal distribution functions. Variation in daily grooming time  
884 among individuals is significantly less than the variation in locomotion. Standard deviation of  
885 grooming is 0.14 compared with 0.34 for locomotion.  $N=66$  flies.

886 (F) Fraction of time spent locomoting and grooming by an individual fly. Fraction is calculated  
887 every 30 minutes.

888 (G) Sketch of the mathematical model that uses four normalized exponential terms to describe  
889 temporal patterns of a fly activity. Parameters  $b_{MD}$ ,  $b_{ER}$ ,  $b_{ED}$ ,  $b_{MR}$ , TM and TE (see text) are  
890 marked in the plot.

891 (H), (I) Comparison of  $b_{MR}$  and TE values between locomotion and grooming. Each circle

892 represents an individual fly and data from the same fly are connected by a solid line.

893

894 **Figure 4 Grooming is under control of the circadian clock**

895 (A) Grooming activity (in 10 minute bins) of wild-type and clock mutants during four days in LD  
896 cycle followed by four days in DD cycle. Grooming traces are population averages. In DD,  
897 WT grooming continues to show 24 hr rhythms. In comparison, grooming in *per<sup>S</sup>* or *per<sup>L</sup>* flies  
898 show shorter or longer rhythms, respectively. For *per<sup>0</sup>* flies, grooming is arrhythmic in DD.  
899 N=8 WT, 8 *per<sup>S</sup>*, 10 *per<sup>L</sup>*, 10 *per<sup>0</sup>*.

900 (B) Autocorrelation of grooming and locomotion. The relatively rapid drop in correlation among  
901 individual grooming events suggest greater short-term (for time lags > 2 minutes)  
902 independence of these events when compared to locomotion. N=8 WT flies.

903 (C) Long-term correlation and circadian rhythmicity in grooming shown by average power spectra  
904 of wild-type, *per<sup>S</sup>* and *per<sup>L</sup>* flies. N=34 WT, 23 *per<sup>S</sup>*, 38 *per<sup>L</sup>*.

905 (D) Daily time spent in grooming is generally unaffected by aberrant circadian rhythms. N=34  
906 WT, 23 *per<sup>S</sup>*, 38 *per<sup>L</sup>*, 20 *per<sup>0</sup>*. In DD, p=0.36 for WT vs *per<sup>S</sup>*, p=0.1 for WT vs *per<sup>L</sup>*, p=0.23  
907 for WT vs *per<sup>0</sup>*.

908 (E) Normalized average amount time spent in grooming (green), visiting food (blue) and  
909 locomotion (gray) during two days in LD (see Methods). Each behavior time series is  
910 normalized by its maximum to allow for easy comparison of their relative phases. In wild-type  
911 flies (top panel), burst in visiting food happens 2-4 after the morning peak in locomotion.  
912 Onset of evening peaks in grooming usually occurs earlier than the peak in locomotion (red  
913 boxes). A close up view is shown on right. N = 8 WT flies (top panel) and N = 10 *per<sup>0</sup>* flies  
914 (bottom panel).

915 (F) The time difference in onset of bursts in grooming and locomotion (gray), grooming and  
916 visiting food (blue), in LD (left) and DD (right).

918 **Figure 5 Amount of grooming is controlled by CYCLE and CLOCK**

919 (A) *cyc*<sup>01</sup> flies groom ~60% more than their background control (p=0.0011). The increase is  
920 unlikely to be a result of a non-working clock, as arrhythmic *per*<sup>0</sup> flies do not show a similar  
921 change (Figure 4C). Instead, lack of CYCLE or genes it helps transcribe, likely elevates  
922 baseline grooming.

923 (B) Grooming of *clk*<sup>Jrk</sup> flies and their background control. *clk*<sup>Jrk</sup> flies show significantly more  
924 grooming than control (p=7.91×10<sup>-9</sup>).

925 (C) Differential grooming response to stress through starvation. Data are averaged from the  
926 second day of 3-day experiments in which during the second day flies were either kept in  
927 normal diet (“Food”) or placed in 1% agarose diet (“Agarose”). *cyc*<sup>01</sup> flies show increased  
928 amount of grooming when starved, while *clk*<sup>Jrk</sup> flies groom less during starvation. Other tested  
929 genotypes maintain grooming at their respective normal levels. N=18, p=0.567 for *per*<sup>0</sup> flies  
930 and N=20, p=0.09 for control. N=18, p=0.029 for *cyc*<sup>01</sup> flies and N=14, p=0.554 for control.  
931 N=28, p=1.75×10<sup>-6</sup> for *clk*<sup>Jrk</sup> flies and N=28, p=0.09 for control.

932 (D) Temporal patterns in WT and *cyc*<sup>01</sup> grooming during a 3-day 12:12 LD experiment in which  
933 flies are starved on a 1% agarose diet during the second day (shaded). Population average  
934 data plotted in one-hour bins (N=10 WT; N=10, *cyc*<sup>0</sup>).

935 (E) and (F) Examples of individual (E) WT and (F) *cyc*<sup>01</sup> flies. Individual time-series are binned  
936 in 15 minutes and include four hours before the start of starvation.

937 (G) Average fraction of time flies spend in grooming (green), locomotion (gray), sleep (yellow),  
938 short rest (purple), and feeding (blue). N=18 *cyc*<sup>01</sup> flies and 14 of control. N=26 *clk*<sup>Jrk</sup> flies and  
939 28 of control.

940

## 941 **Supplementary Files**

### 942 **Supplementary Figure S1: Grooming tracking algorithm**

943 (A) Locomotion (fraction of time spent), relative humidity (RH), and temperature (T) for 3 days in  
944 constant darkness (DD) conditions. Data are binned in five minutes.

945 (B) Binary images after background subtraction. If the background frame is not updated frequently  
946 (typically every 1000 seconds), both food debris (red boxes) and flies (blue boxes) may be  
947 identified as moving objects in a background-subtracted image (top, left and expanded view). The  
948 problem is rectified (bottom, left) when the background frame used is closer in time (<1000  
949 seconds apart) to the image of interest.

950 (C) The distribution of grayscale fluctuations in the absence of mobile flies. A cutoff of grayscale  
951 value change  $C_0 = 10$  rules out > 99.99% of fluctuations.

952 (D) Maximum area (pixels) of a closed object generated by noise when different thresholds  $C_0$  are  
953 applied. A choice of  $C_0 = 10$  rejects objects larger than 20 pixels without affecting identification of  
954 flies which have a typical area of ~300 pixels in our studies.

955 (E) An example 8-bit frame (on left) and its corresponding background-subtracted binary image  
956 showing identified flies.

957 (F) Grayscale value distribution of pixels belonging to 20 individual flies. Two regions are clearly  
958 seen: the left region with peak around 50 represents the core of the flies and the right region with  
959 peak around 90 represents their periphery.

960 (G) Variations in the center position of a stationary fly. The minimum displacement that represents  
961 a true fly center movement is 0.5 pixel length in our experiment, a requirement that excludes  
962 99.66% of false displacements.

963 (H) The cross validation loss of  $k$ NN classifier at different  $k$  values. No significant difference  
964 between using raw features (black) or PCA-derived orthogonal features (red). Loss decreases

965 with increasing  $k$  values, slowing down for  $k \approx 10$ . The loss function shown here is the averaged  
966 error of 10-fold cross validation in behavioral classification. The validation was performed on  
967 25000 frames from video of 20 flies.  
968

969 **Supplementary Figure S2: Circadian regulation on locomotion**

970 (A) Position (top row), locomotion level (middle) and grooming level (bottom) of a single fly during  
971 two days in LD followed by two days in DD conditions. Locomotion and grooming are shown in  
972 terms of the amount of time (in minutes) spent by the fly in the two activities. The data are plotted  
973 in 5 min bins. White/black bars indicate light/dark conditions, respectively.

974 (B) Inter-individual differences of daily grooming and locomotion in constant darkness.  
975 Distributions of normalized individual grooming and locomotion (amount of daily  
976 grooming/locomotion of individuals divided by population average) are fitted to normal distribution.  
977 Variation in daily grooming time among individuals is significantly less than the variation in  
978 locomotion with the standard deviation of grooming being 0.16 and that of locomotion being 0.25.  
979 N=34 wild-type flies.

980 (C) Locomotor activity (in 10 minute bins) of WT and clock mutants during four days in LD cycle  
981 followed by four days in DD cycles. Both activities are population averages. N=8 WT, 8 *per<sup>S</sup>*, 10  
982 *per<sup>L</sup>*, 10 *per<sup>0</sup>*.

983 (D) Average power spectra of wild-type, *per<sup>S</sup>* and *per<sup>L</sup>* locomotion in DD. N=34 wildtype, 23 *per<sup>S</sup>*,  
984 38 *per<sup>L</sup>*.

985 (E) Daily time spent in locomotion by WT and clock mutants under LD and DD cycles. In most  
986 cases, locomotion time increases under constant darkness.



987 **Supplementary Figure S3:**

988 (A) Normalized average amount time spent in grooming (orange) and locomotion (black) during  
989 four days in LD. Each behavior time series is normalized by its maximum. Change of grooming  
990 between day and night, especially the change from night to morning, is smaller than the  
991 corresponding change in locomotion. This difference between grooming and locomotion indicates  
992 a small increasing rate parameter ( $b_{MR}$ ) for grooming. N=10 WT flies.

993 (B) (C) (D) (E) Rate parameters  $b_{MD}$ ,  $b_{ER}$ ,  $b_{ED}$  and duration of morning peaks (TM) do not show  
994 significant differences between grooming and locomotion.

995 **Supplementary Figure S4**

996 (A), (B) Fraction of time spent daily in locomotion by *cyc<sup>01</sup>*, *clk<sup>Jrk</sup>* and their controls. *cyc<sup>01</sup>* flies  
997 spend less time in locomotion than control flies ( $p=0.0014$ ). In contrast, *clk<sup>Jrk</sup>* flies dedicate more  
998 time to locomotor activity than their controls ( $p<0.001$ ).

999 (C) Fraction of time spent in locomotion in response to stress through starvation. All strains of  
1000 flies show increased amount of locomotion when starved. N=18 *per<sup>0</sup>* flies and 20 of control. N=18  
1001 *cyc<sup>01</sup>* flies and 14 of control. N=28 *clk<sup>Jrk</sup>* flies and 28 of control.

1002 (D) Temporal patterns in WT (N= 10) and *cyc<sup>01</sup>* (N= 10) locomotion during a 3-day 12:12 LD  
1003 experiment in which flies are starved on a 1% agarose diet during the second day (shaded).  
1004 Population average data plotted in one-hour bins. Flies show elevated locomotion when starved.  
1005 In two panels on right, WT grooming and locomotion from individual days are plotted separately  
1006 for comparison.

1007 (E), (F) Temporal patterns of (E) grooming and (F) locomotion of control (N= 10) and *clk<sup>Jrk</sup>* (N=  
1008 10) flies during the first 2 days of a starvation experiment. In the experiment, flies are given regular  
1009 corn meal on the first day, and 1% agarose on day 2 (shaded). The data are shown in one-hour  
1010 bins.

1011

1012 **Supplementary Figure S5**

1013 Average fraction of time flies spend in grooming (green), locomotion (gray), sleep (yellow), short  
1014 rest (purple) and feeding (blue). N=17 *per<sup>0</sup>* flies and 20 of control. N=18 *cyc<sup>01</sup>* flies and 1 of  
1015 control. N=25 *clk<sup>Jrk</sup>* flies and 28 of control. The ranked amount of time in behaviors is shown  
1016 below each pie-chart, with G, L, S, R, F representing grooming, locomotion, sleep, short rest  
1017 and feeding, respectively.

1018 **Supplementary Figure S6**

1019 Immune systems may regulate the amount of grooming. Pathogens can infect fly through  
1020 breaching the cuticle . Since one of the main function of grooming is to keep body surface clean,  
1021 it is possible that grooming might work as part of immune systems. We test two mutant fly strains  
1022 *imd* and *PGRP-SA<sup>seml</sup>*, both of which have defective immune systems. Mutants *PGRP-SA<sup>seml</sup>* and  
1023 *imd* are on *Oregon R* background.

1024 (A), (B) Grooming and locomotion in *imd* flies are significantly less than control flies ( $p < 0.001$  for  
1025 both grooming and locomotion), while *PGRP-SA<sup>seml</sup>* does not significantly affect the time spent in  
1026 grooming or locomotion. This suggests that *Drosophila* grooming relies on a working immune  
1027 system. The decrease in *imd* flies further suggests that this impact may be independent of the  
1028 Toll pathway.

1029 (C), (D) In both *imd* and control flies, locomotion increases significantly when starved ( $p < 0.001$   
1030 for WT and  $p < 0.01$  for *imd*), without a robust change in grooming in either strain.

1031

1032 **Rich Media Files**

1033 **Video 1: Sample raw experimental video**

1034 **Video 2: Sample video of grooming on head and front legs**

1035 **Video 3: Sample video of grooming on wings and hind legs**

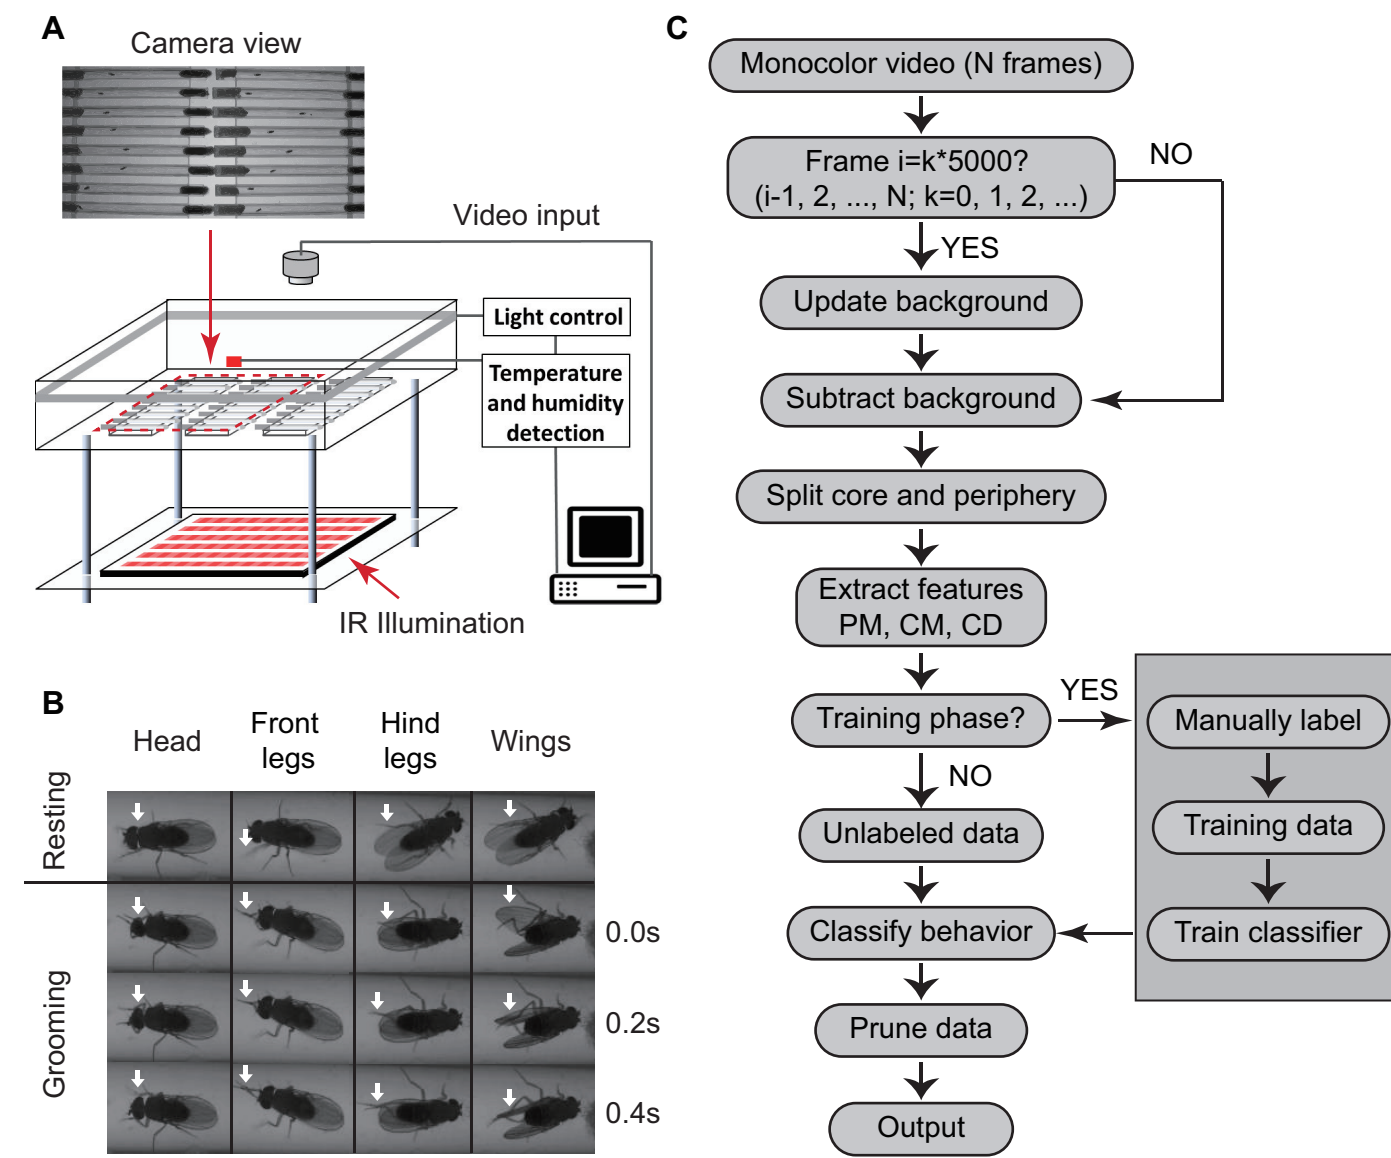

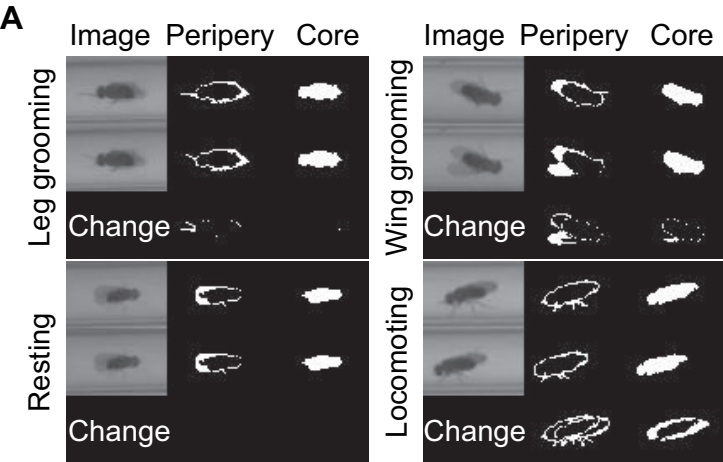

**B**

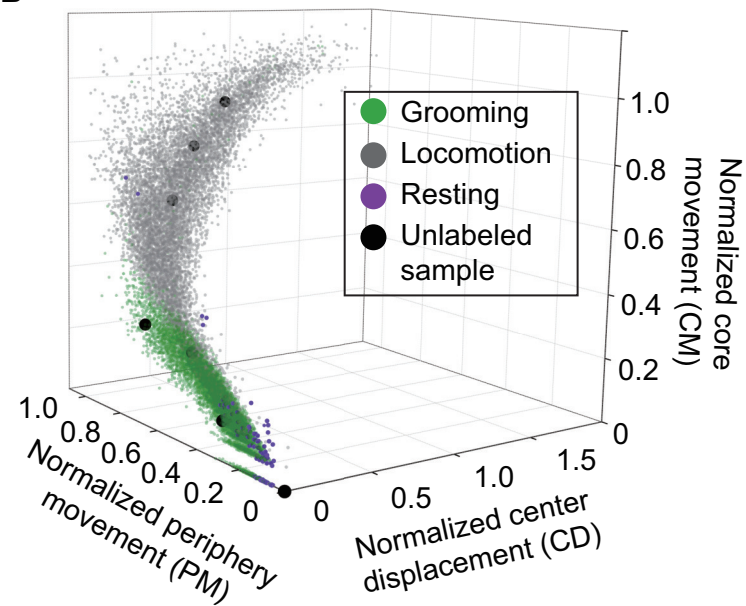

**C**

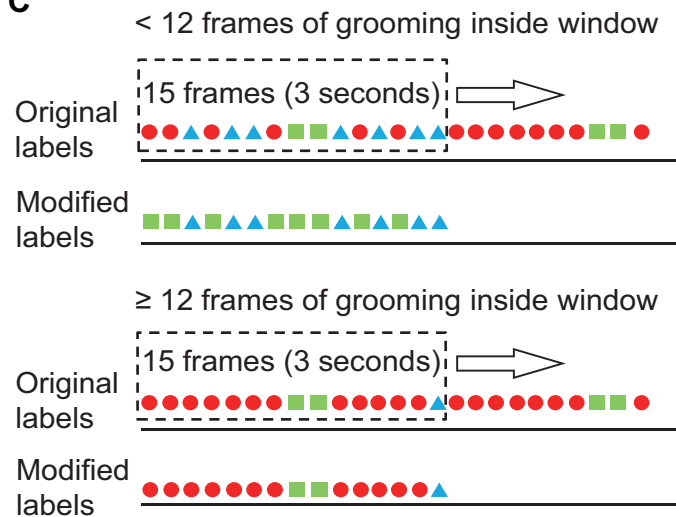

**D**

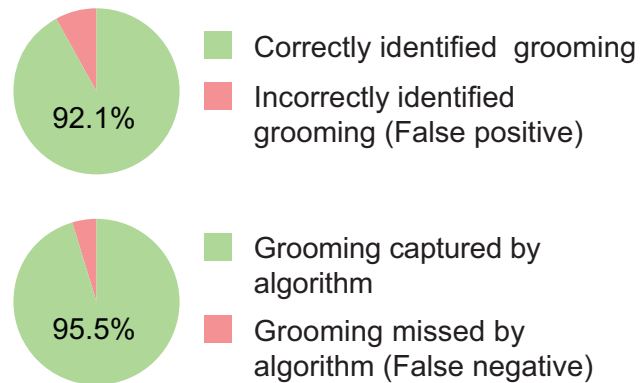

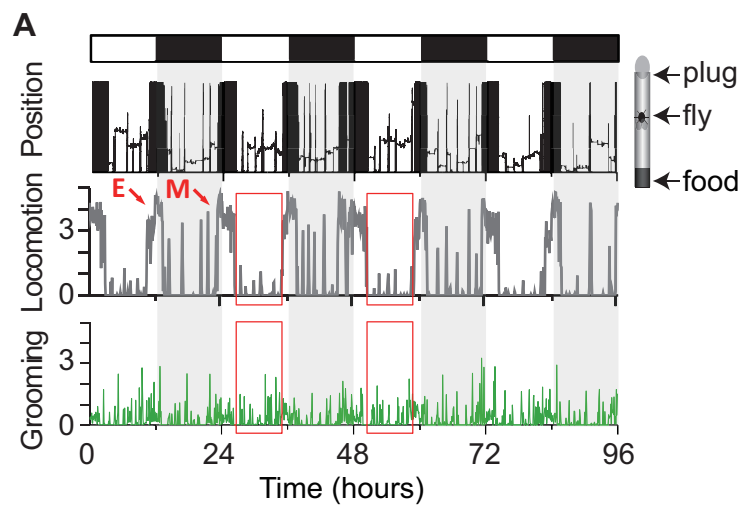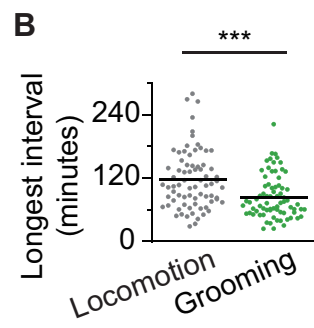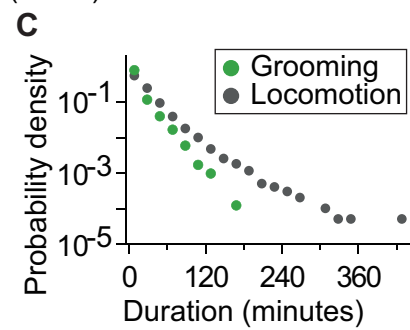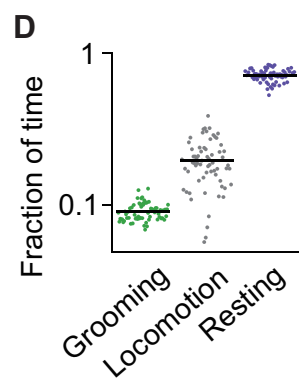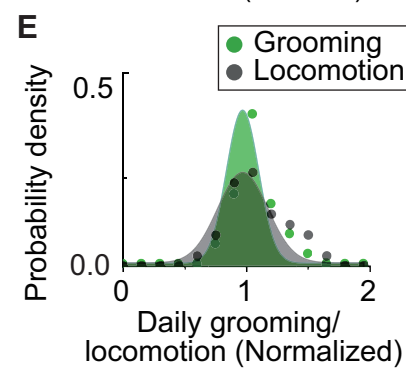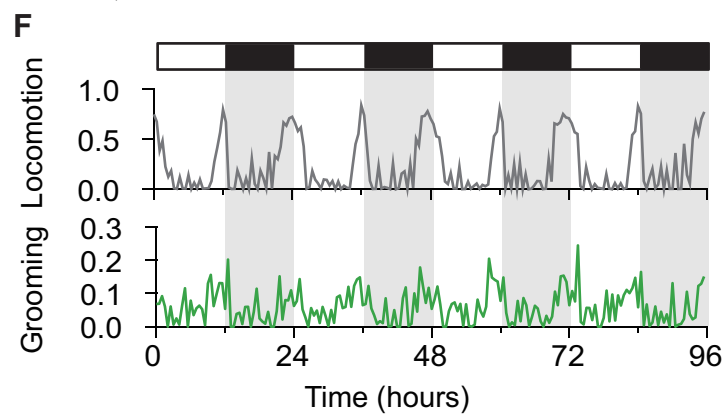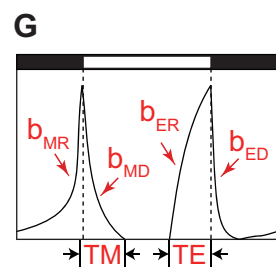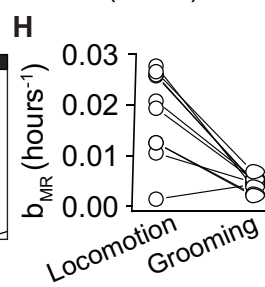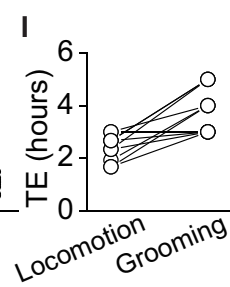



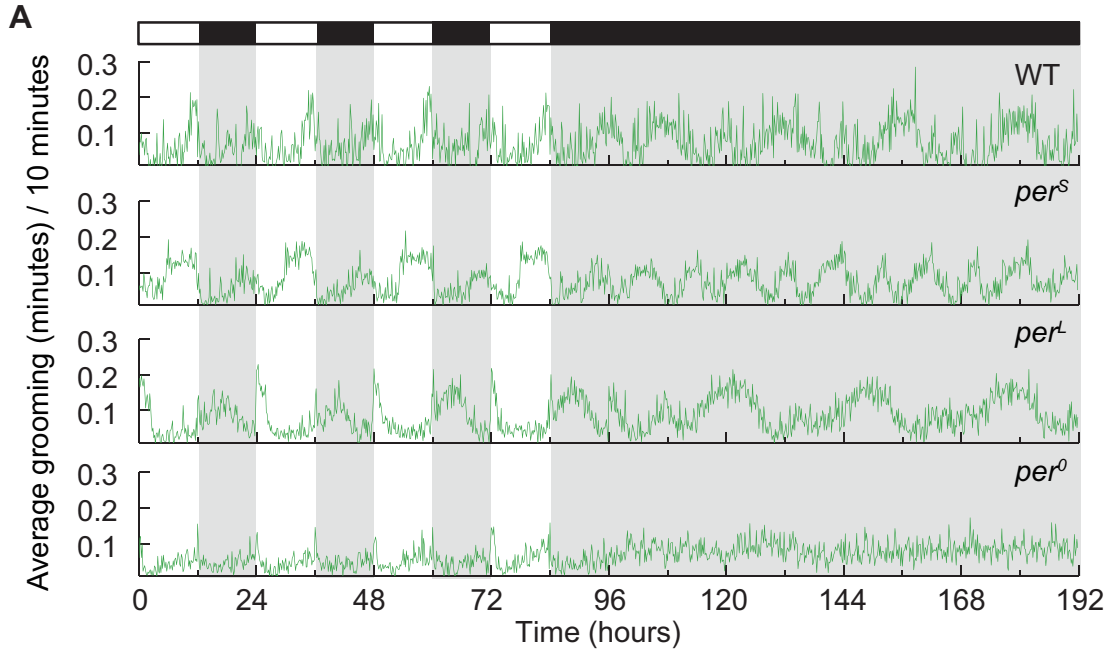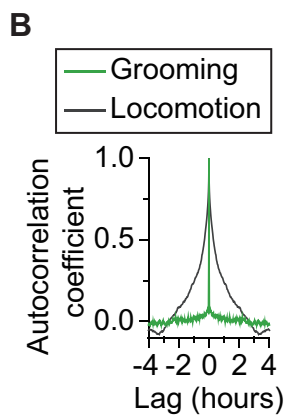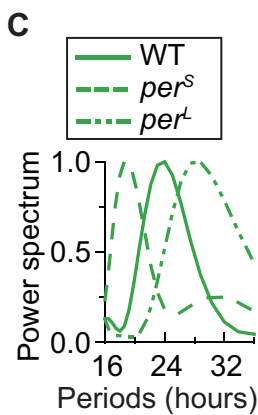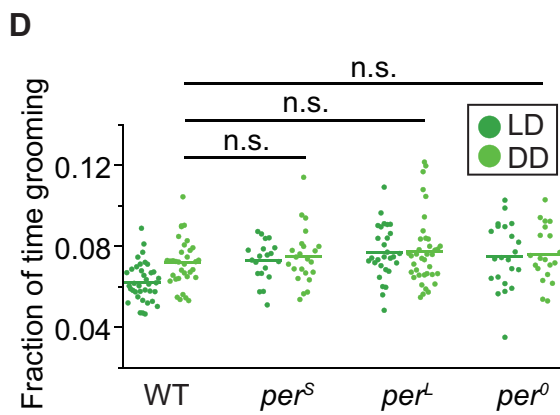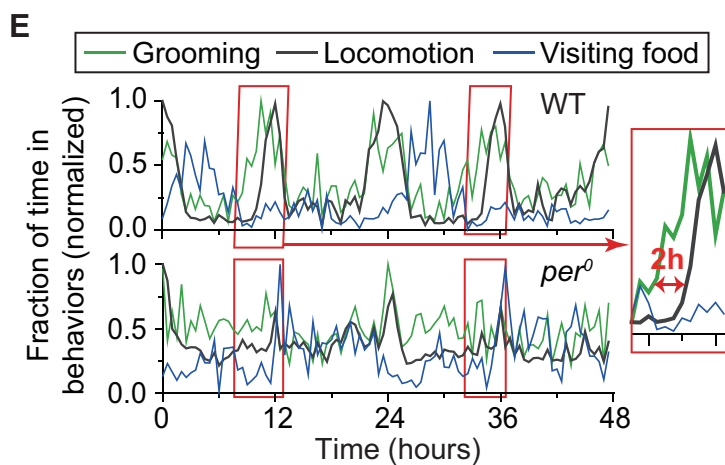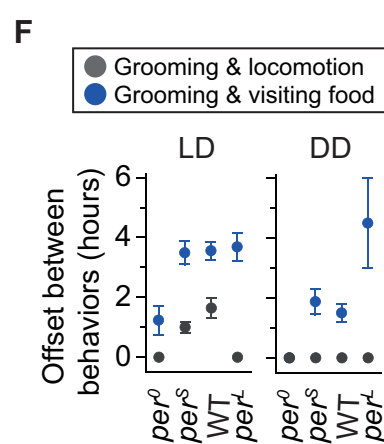

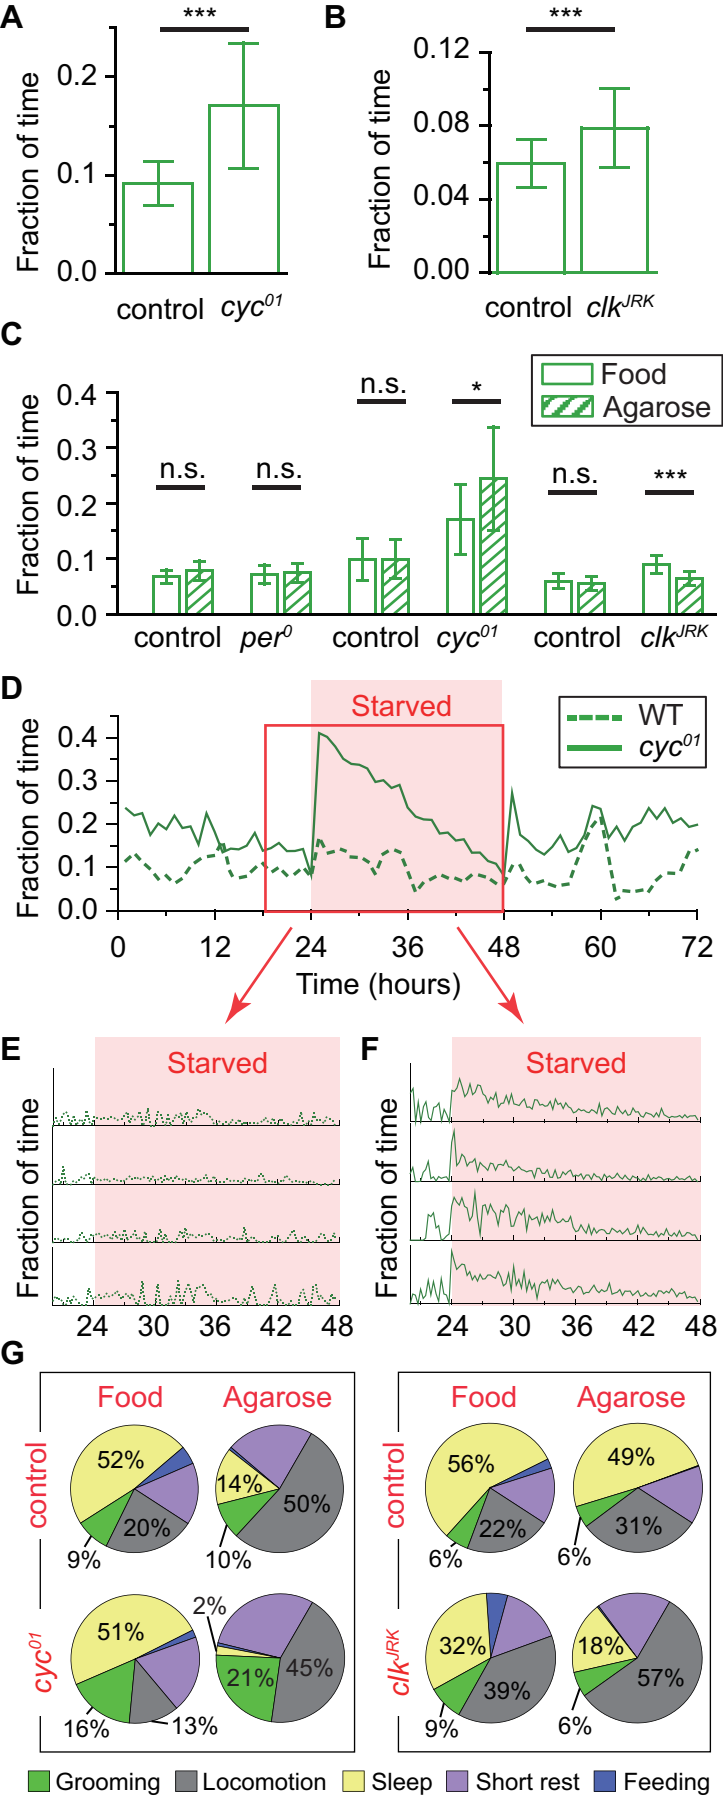

S1

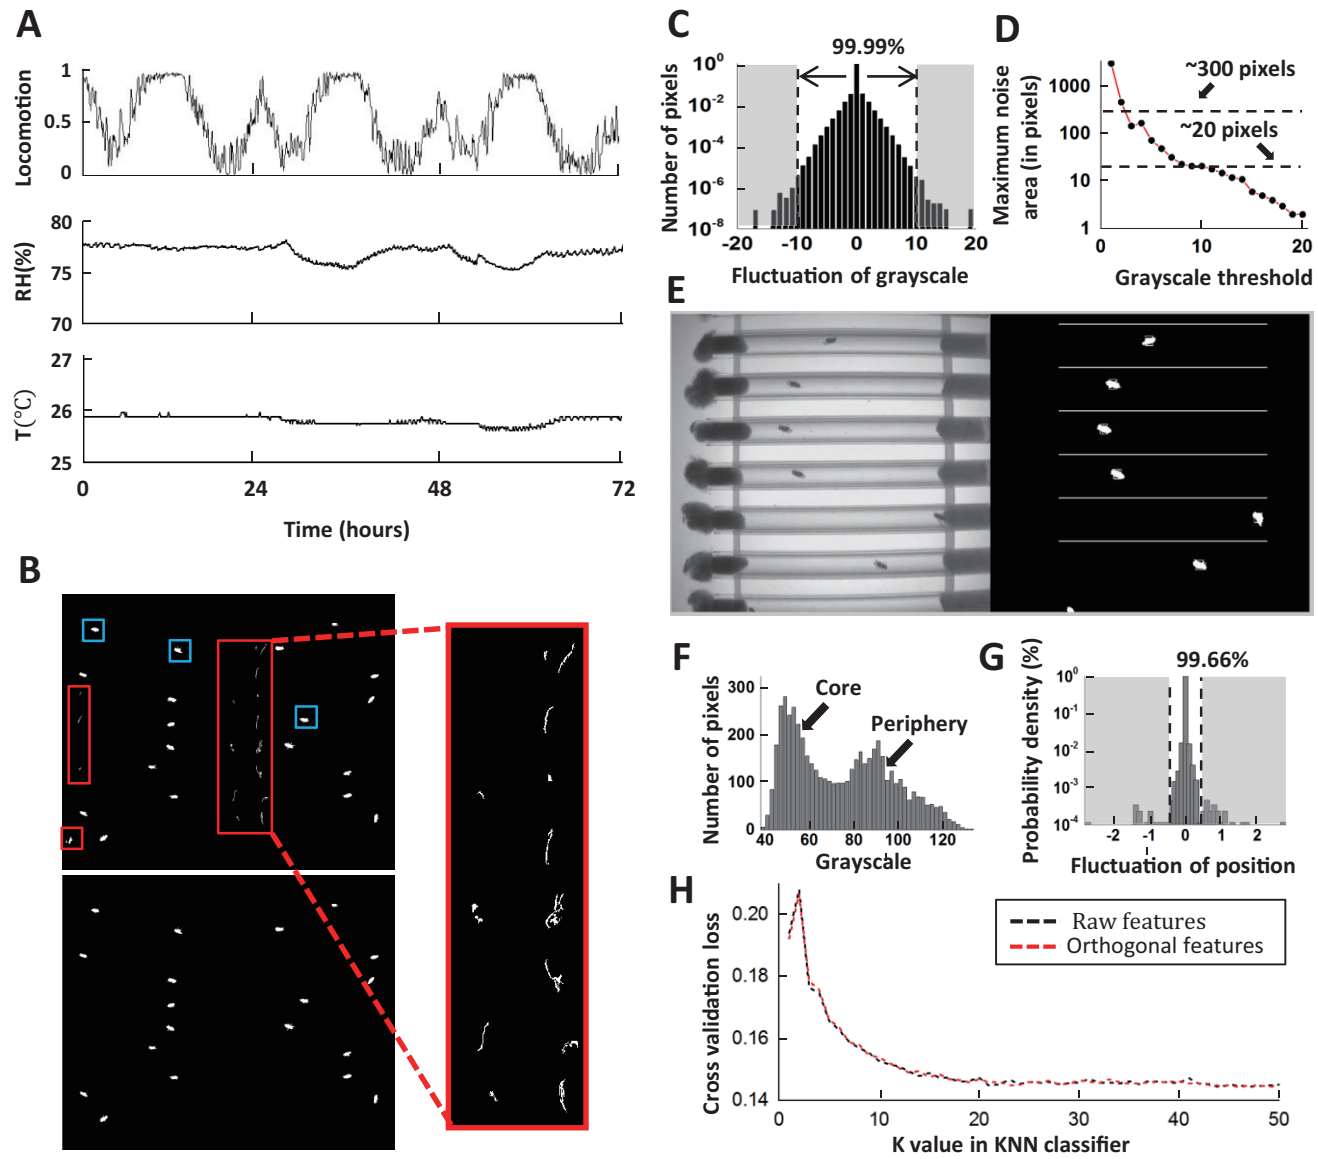

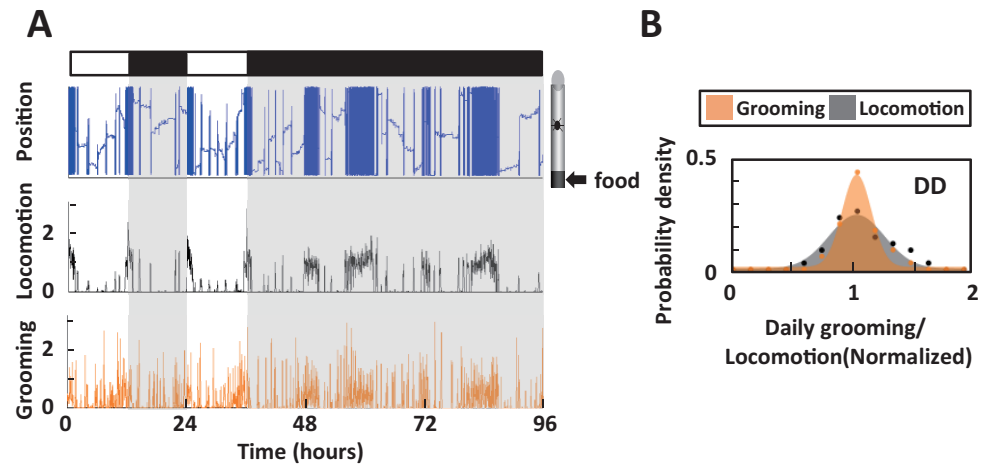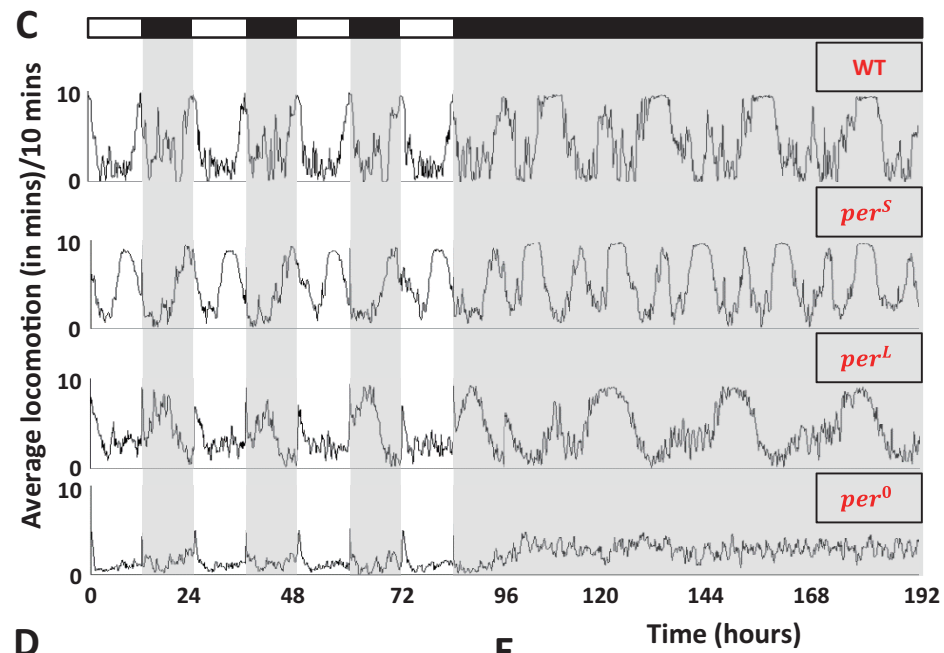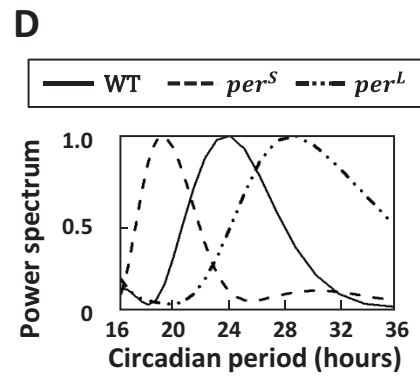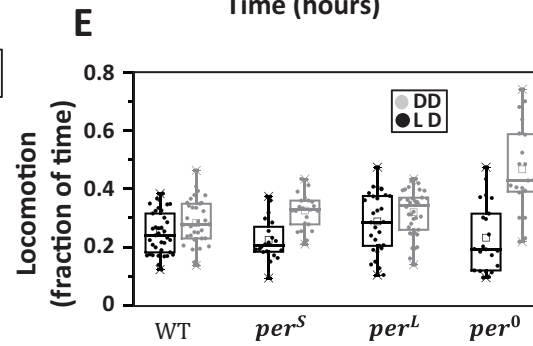

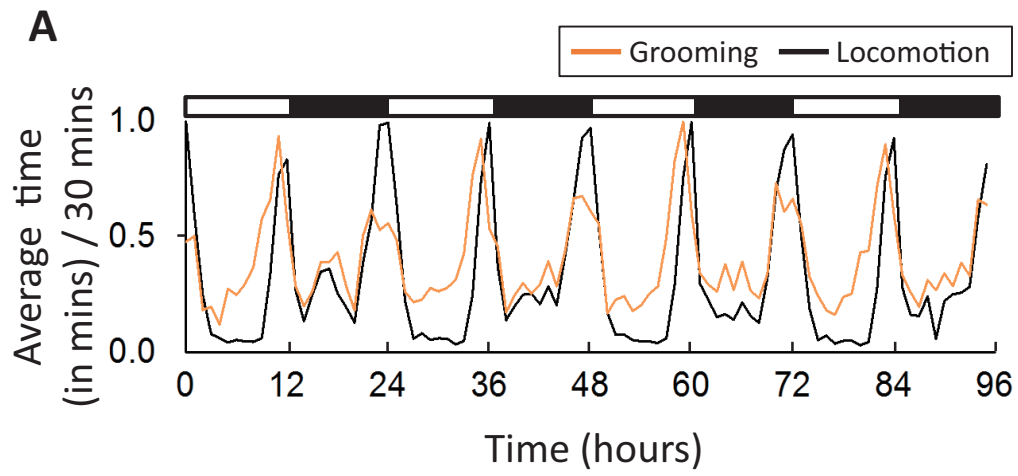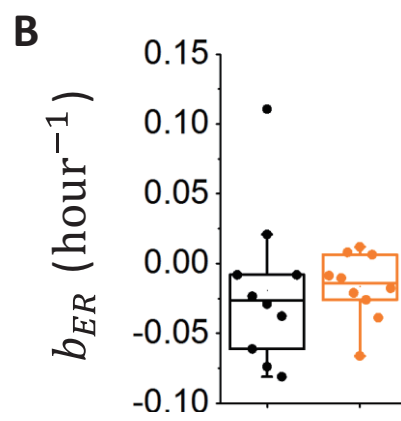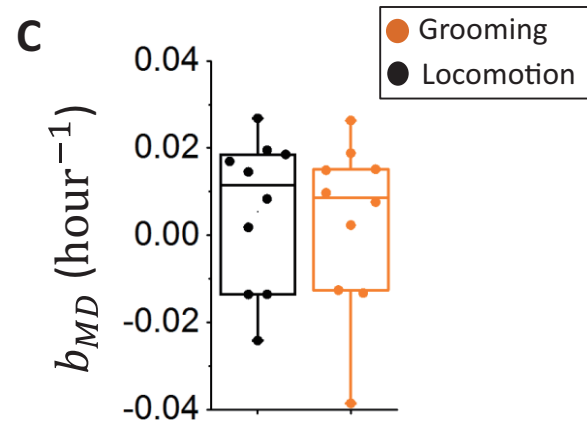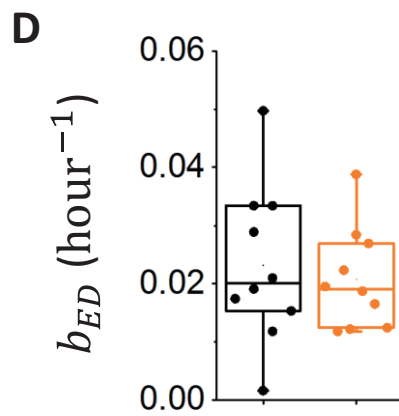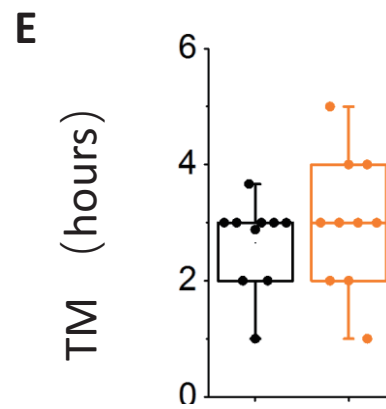

S4

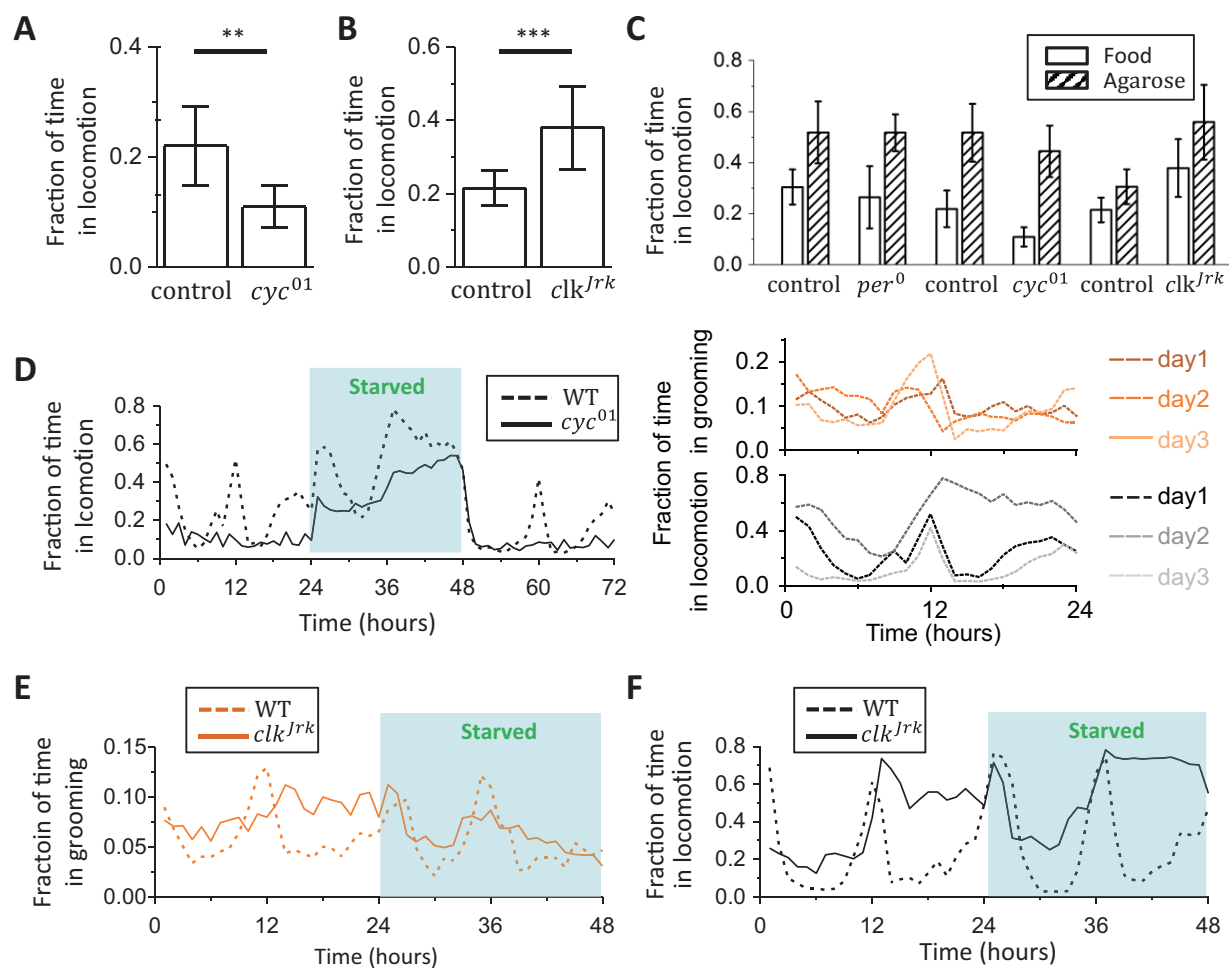

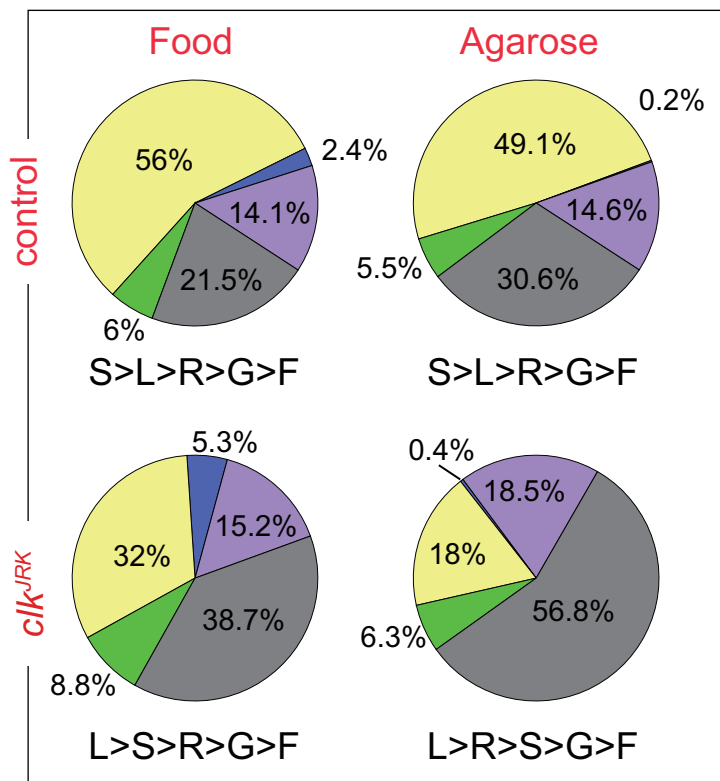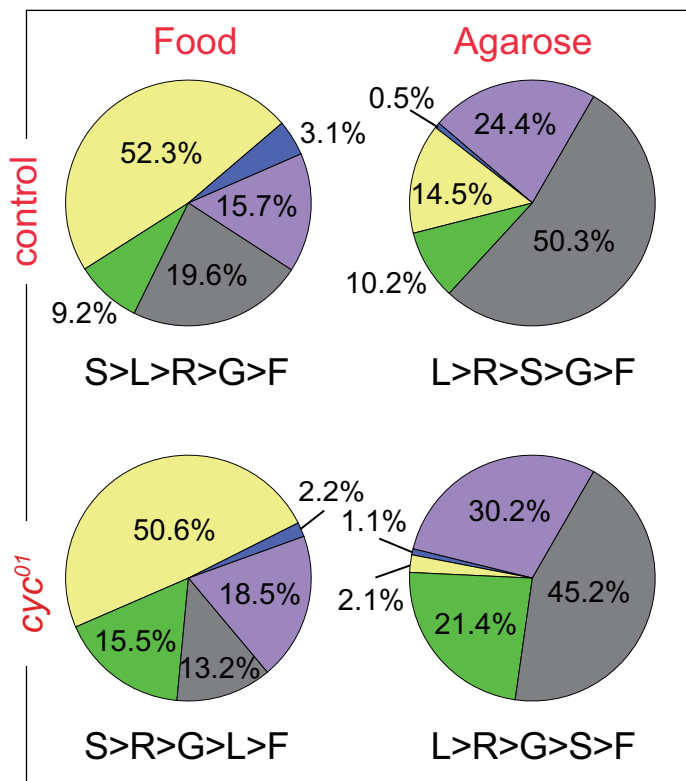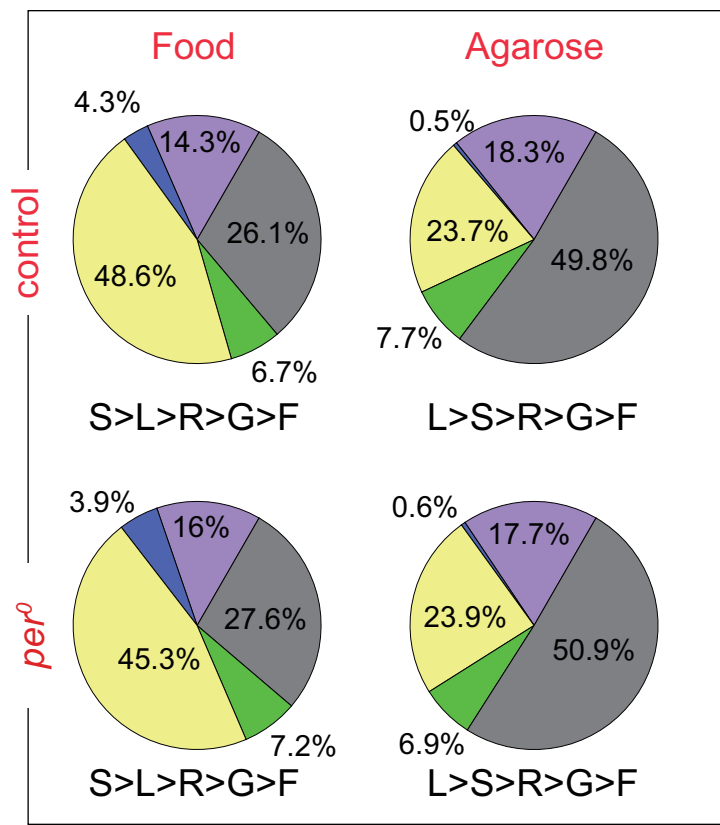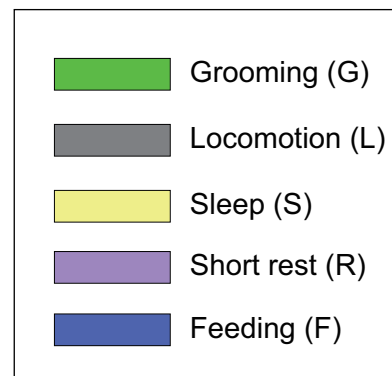

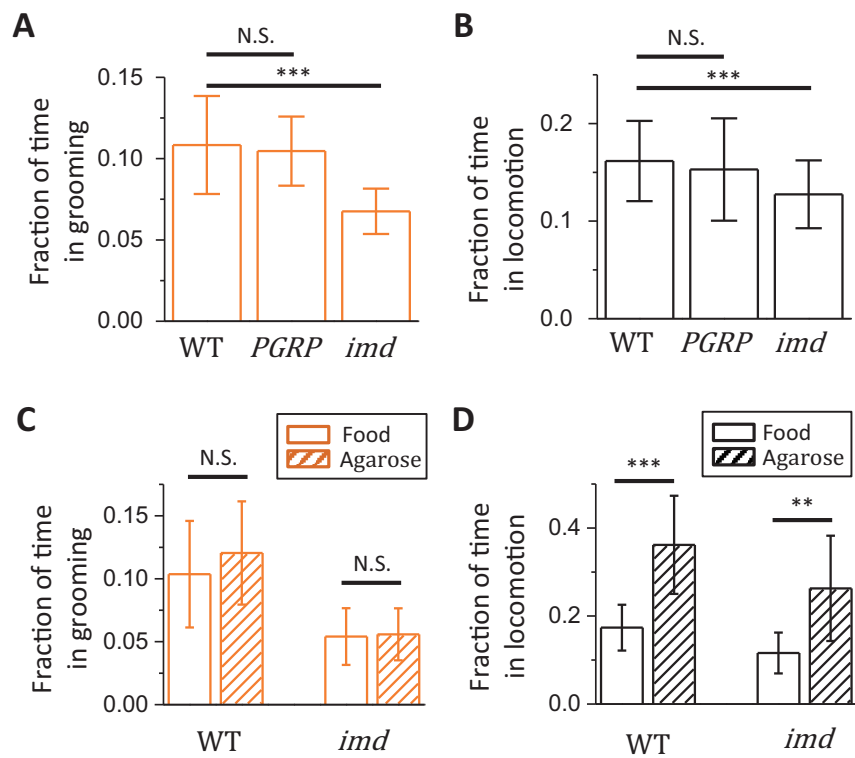

Source: http://www.biorxiv.org/content/10.1101/166561v1.full.pdf
